1 **Double maternal effect: duplicated nucleoplasmin 2 genes, *npm2a* and *npm2b*, are**  
2 **shared by fish and tetrapods, and have distinct and essential roles in early**  
3 **embryogenesis**

4 Caroline T. Cheung<sup>(1, #)</sup>, Jérémy Pasquier<sup>(1, #)</sup>, Aurélien Bouleau<sup>(1)</sup>, Thao-Vi Nguyen<sup>(1)</sup>, Franck  
5 Chesnel<sup>(2)</sup>, Yann Guiguen<sup>(1)</sup>, and Julien Bobe<sup>(1)\*</sup>

6

7 <sup>(1)</sup>INRA LPGP UR1037, Campus de Beaulieu, 35042 Rennes, FRANCE.

8 <sup>(2)</sup>CNRS/ UMR6290, Université de Rennes 1, 35000 Rennes, FRANCE.

9

10 \* Corresponding author E-mail: [julien.bobe@inra.fr](mailto:julien.bobe@inra.fr)

11 Authors contributed equally to this work: #

12

13 Short Title: *npm2* genes have maternal effect in vertebrates

14 **Abstract**

15 *Nucleoplasmin 2 (npm2)* is an essential maternal-effect gene that mediates early embryonic  
16 events through its function as a histone chaperone that remodels chromatin. Here we report  
17 the existence of two *npm2* (*npm2a* and *npm2b*) genes in zebrafish. We examined the  
18 evolution of *npm2a* and *npm2b* in a variety of vertebrates, their potential phylogenetic  
19 relationships, and their biological functions using knockout models via the CRISPR/cas9  
20 system. We demonstrated that the two *npm2* duplicates exist in a wide range of vertebrates,  
21 including sharks, ray-finned fish, amphibians, and sauropsids, while *npm2a* was lost in  
22 Coelacanth and mammals, as well as some specific teleost lineages. Using phylogeny and  
23 synteny analyses, we traced their origins to the early stages of vertebrate evolution. Our  
24 findings suggested that *npm2a* and *npm2b* resulted from an ancient local gene duplication,  
25 and their functions diverged although key protein domains were conserved. We then  
26 investigated their functions by examining their tissue distribution in a wide variety of species  
27 and found that they shared ovarian-specific expression, a key feature of maternal-effect  
28 genes. We also showed that both *npm2a* and *npm2b* are maternally-inherited transcripts in  
29 vertebrates. Moreover, we used zebrafish knockouts to demonstrate that *npm2a* and *npm2b*  
30 play essential, but distinct, roles in early embryogenesis. *npm2a* functions very early during  
31 embryogenesis, at or immediately after fertilization, while *npm2b* is involved in processes  
32 leading up to or during zygotic genome activation. These novel findings will broaden our  
33 knowledge on the evolutionary diversity of maternal-effect genes and underlying mechanisms  
34 that contribute to vertebrate reproductive success.

35

36

## 37 **Author Summary**

38 The protein and transcript of the *npm2* gene have been previously demonstrated as maternal  
39 contributions to embryos of several vertebrates. Recently, two *npm2* genes, denoted here as  
40 *npm2a* and *npm2b*, were discovered in zebrafish. This study was conducted to explore the  
41 evolutionary origin and changes that occurred that culminated in their current functions. We  
42 found that an ancient local duplication of the ancestral *npm2* gene created the current two  
43 forms, and while most vertebrates retained both genes, notably, mammals and certain species  
44 of fish lost *npm2a* and, albeit rarely, both *npm2a* and *npm2b*. Our functional analyses showed  
45 that *npm2a* and *npm2b* have diverse but essential functions during embryogenesis, as *npm2a*  
46 mutants failed to undergo development at the earliest stage while *npm2b* mutants developed,  
47 although abnormally, until the zygotic genome activation stage after which their development  
48 was arrested followed subsequently by death. Our study is the first to clearly demonstrate the  
49 evolution, diversification, and functional analyses of the *npm2* genes, which are essential  
50 maternal factors that are required for proper embryonic development and survival.

51

52

## 53 **Introduction**

54 In animals and plants, early embryonic development relies strictly on maternal  
55 products until maternal-to-zygotic transition (MZT) during which zygotic genome activation  
56 (ZGA) occurs [1]. Maternal-effect genes are those that are transcribed from the maternal  
57 genome and whose products, which include transcripts, proteins, and other biomolecules, are  
58 deposited into the oocytes during their production in order to coordinate embryonic  
59 development before ZGA [2]. MZT is a key step that is needed firstly for clearance of  
60 maternal components, and secondly to activate zygotic gene expression and to allow  
61 subsequent embryonic development. Among the maternally-inherited transcripts that play

62 important roles during early development, some genes were demonstrated to regulate zygotic  
63 program activation such as *nanog*, *pou5f1*, and *sox1* in zebrafish (*Danio rerio*) [3].  
64 Henceforth, all gene and protein nomenclature will be based on that of zebrafish regardless of  
65 species for simplification purposes. Those factors were shown to participate in the regulation  
66 of “first wave” zygotic genes and among them, mir-430, a conserved microRNA that has  
67 been shown to be involved in clearance of maternal mRNAs in zebrafish [4][5], as well as  
68 mir-427, its orthologue in *Xenopus* [6]. microRNAs may also have maternal effects by  
69 functioning in a similar manner to protein-coding genes, and recent revelations showed that  
70 there is a subset of microRNAs that are predominantly expressed in the fish ovary and may  
71 function in oogenesis and early embryogenesis [7]. Another gene, *nucleoplasmin 2* (*npm2*),  
72 belongs to the family of nucleoplasmins/nucleophosmins that is maternally-inherited at both  
73 protein and mRNA levels, whereby both play important roles in early development [8].  
74 Historically, this protein was identified and defined as a nuclear chaperone in *Xenopus*  
75 [9,10]. While the protein has been shown to be the most abundant nuclear protein in the  
76 *Xenopus* oocyte [11] and to play a crucial role at fertilization due to its role in sperm  
77 chromatin decondensation [12,13], its maternally-inherited mRNA has been recently  
78 demonstrated to be translated as a *de novo* synthesized protein that could play a crucial role  
79 during ZGA in zebrafish [8]. Further, *npm2* is one of the first identified maternal-effect genes  
80 in mouse whereby its deficiency results in developmental defects and eventual embryonic  
81 mortality [14].

82         The *npm2* gene belongs to the *npm* gene family that encompasses four members,  
83 *npm1*, *npm2*, *npm3*, and *npm4*. The diversity of the Npm family has been shown to result  
84 from the two rounds of whole genome duplication (WGD) that occurred in early vertebrates  
85 (vertebrate genome duplication 1 and 2, or VGD1 & VGD2, respectively) [15,16]. Former  
86 evolutionary studies clearly provided a phylogenic model of this family; VGD1 produced two

87 genes, *npm3/2* and *npm4/1*, from an ancestral *npm* gene and the following WGD, VGD2,  
88 further created the current four *npm* types with subsequent loss of *npm4* from mammals, but  
89 retained in most fish species [17–20]. Recently, two *npm2* genes were automatically  
90 annotated in the zebrafish genome, i.e. *npm2a* (ENSDARG00000076391) and *npm2b*  
91 (previously known as *npm2*, ENSDARG00000053963). As the teleost ancestor experienced  
92 an extra WGD event (TGD, or teleost-specific genome duplication) [21], doubling of genes  
93 and other types of genomic rearrangement may be present in teleost species compared with  
94 other vertebrates. Moreover, a fourth round of duplication occurred more recently in  
95 salmonids (salmonid-specific genome duplication or SaGD) [22,23], leading to further  
96 possible doubling of genes and other genomic rearrangements. As multiple evolutionary  
97 events (impact of TGD, local duplication, teleost-specific duplication, etc.) could have led to  
98 the *npm2a/npm2b* diversity in zebrafish, which in turn may have significant impact on  
99 vertebrate reproduction, we investigated the evolution of *npm2a* and *npm2b* in a wide range  
100 of vertebrate species, their potential phylogenetic relationship, as well as their biological  
101 functions using transgenic zebrafish models created by the CRISPR/cas9 system in order to  
102 broaden our knowledge on the evolutionary diversity of maternal-effect genes and the  
103 underlying mechanisms that contribute to reproductive success in vertebrates.

104

105

## 106 **Results and Discussion**

107 As previously shown, *npm1*, *npm2*, *npm3* and *npm4* genes are thought to have  
108 originated from the first two rounds of WGD, VGD1 and VGD2, which occurred early on in  
109 vertebrate evolution [17–20]. However, two *npm2* genes have been automatically annotated  
110 in the zebrafish genome, i.e. *npm2a* and *npm2b*. In order to verify if these two *npm2* genes  
111 are paralogous to each other and to determine their origination, we used a Blast search

112 approach in various public databases to retrieve a multitude of sequences that could be related  
113 to *npm2* genes. All retrieved sequences are compiled in Supplemental Table S1.

114

## 115 *Diversity of npm2a and npm2b in vertebrates*

### 116 Phylogenetic analysis

117 In order to verify that the retrieved protein sequences (Supplemental Table S1) were  
118 homologous to zebrafish Npm2a and Npm2b, a phylogenetic analysis on Npm2 was  
119 performed. Based on the alignment of 76 vertebrate Npm2-related sequences, and using  
120 vertebrate Npm1 and Npm3 amino acid sequences as out-groups, a phylogenetic tree was  
121 generated (Fig. 1). As shown in Fig. 1, vertebrate Npm2-related sequences clustered into two  
122 clades, Npm2a and Npm2b, which were supported by significant bootstrap values, 84.2% and  
123 78.2%, respectively.

124 There were 28 sequences that clustered in the Npm2a clade, which encompassed  
125 sequences belonging to species from various vertebrate groups, including chondrichthyans  
126 (such as dogfish Npm2a), ray-finned fish, and sarcopterygians (lobe-finned fish and  
127 tetrapods). The sequences belonging to ray-finned fish included gar and bowfin Npm2a, as  
128 well as teleost sequences such as zebrafish, northern pike, and rainbow trout Npm2a. In  
129 contrast, no Npm2a sequence was identified in neoteleostei (medaka, European perch, and  
130 Atlantic cod). The sequences belonging to sarcopterygians included amphibian (*Xenopus*)  
131 Npm2a, as well as sauropsid sequences such as Chinese alligator, chicken, penguin, and ibis  
132 Npm2a, although no Npm2a sequence could be identified in mammals. These results  
133 provided the first evidence for the presence of orthologs to zebrafish Npm2a across  
134 evolutionary divergent vertebrate groups (i.e. sauropsids, amphibians, and fish).

135 The Npm2b clade included 48 of the retrieved sequences. Like the Npm2a clade, the  
136 Npm2b clade also encompassed sequences belonging to species from all of the main

137 vertebrate groups, including chondrichthyans (such as dogfish Npm2b), ray-finned fish, and  
138 sarcopterygians. Ray-finned fish sequences included gar and bowfin Npm2b in addition to  
139 teleost sequences such as zebrafish and northern pike Npm2b. Our analysis also demonstrated  
140 the existence of two paralogous Npm2b proteins (*i.e.* Npm2b1 and Npm2b2) in all of the  
141 investigated salmonid species (rainbow trout, brown trout, and brook trout). In contrast, no  
142 Npm2b sequence could be identified in any neoteleostean species, including medaka, cod,  
143 perch, fugu, tetraodon, and stickleback. The sequences belonging to sarcopterygians included  
144 amphibian sequences such as *Xenopus* Npm2b, sauropsid sequences such as Chinese  
145 alligator, ostrich, penguin and chicken Npm2b, as well as mammalian sequences such as  
146 human and mouse Npm2. These results demonstrated, for the first time, that proteins  
147 previously reported as Npm2 (*Xenopus*, cattle, mouse, human, zebrafish) are orthologous to  
148 Npm2b in all investigated vertebrate species, and should therefore now be referred to as  
149 Npm2b. In addition, with the presence of Npm2b1 and Npm2b2 in all investigated salmonid  
150 species, we provided for the first time evidence of the existence of two Npm2b protein forms  
151 in vertebrate species.

152         The existence of the two Npm2 clades indicated that Npm2a and Npm2b are likely  
153 paralogous to each other. In addition, comparison of Npm2a and Npm2b amino acid  
154 sequences in the species that harbor both revealed that they share between 30.2% and 46.4%  
155 homology, depending on the species (Supplemental Table S2). The low sequence identity is  
156 consistent with an ancient duplication event that gave rise to *npm2a* and *npm2b* genes.  
157 However, neither the topology of the Npm2 phylogenetic tree nor the comparison between  
158 Npm2a and Npm2b could indicate the kind of duplication event that had occurred. In  
159 contrast, the high sequence identity shared by Npm2b1 and Npm2b2 in salmonids (between  
160 75.1% and 86%) suggested a more recent duplication event. This observation in all of the

161 investigated salmonid species is consistent with the hypothesis that *npm2b1* and *npm2b2*  
162 genes likely resulted from the SaGD.

### 163 Synteny analysis

164 In order to further understand the origin of the *npm2a* and *npm2b* genes in vertebrates,  
165 we performed a synteny analysis of their neighboring genes in representative vertebrate  
166 genomes. We focused our study on two mammals (human and mouse), two sauropsids  
167 (Chinese alligator and chicken), two amphibians (*Xenopus tropicalis* and *laevis* L), one basal  
168 sarcopterygian (coelacanth), one basal actinopterygian (spotted gar), and two teleosts  
169 (zebrafish and tetraodon) (Fig. 2). Analysis was also performed on the *Xenopus laevis* S  
170 subgenome, but since the results were very similar to that of *Xenopus laevis* L subgenome,  
171 we only showed the latter's data [24].

172 The human, mouse, Chinese alligator, *Xenopus tropicalis* and *laevis*, coelacanth,  
173 spotted gar, and zebrafish *npm2b* genes are located in genomic regions containing common  
174 loci, including *dok2*, *xpo7*, *fgf17*, *dmtn*, *lgi3*, *bmp1*, *sorbs3*, *pdlim2*, *gpr124*, *prlhr*, *got11l*,  
175 *adrb3*, and *nkx6-3*. Together with the phylogenetic analysis, this indicates that *npm2b* genes  
176 investigated here are orthologous. Synteny analysis revealed the absence of the *npm2b* gene  
177 in tetraodon although the above-mentioned neighbouring genes are present in its genome  
178 (Fig. 2 and Supplemental Table S3).

179 The Chinese alligator, chicken, *Xenopus tropicalis* and *laevis*, spotted gar, and  
180 zebrafish *npm2a* genes are located in genomic regions containing the same loci as *npm2b*  
181 conserved regions (Fig. 2). Indeed, Chinese alligator and spotted gar *npm2a* and *npm2b* genes  
182 are located in the vicinity of each other on scaffold 98.1 and the linkage group LG1,  
183 respectively. The presence of *npm2a* and *npm2b* genes in the same genomic region in  
184 representative species of sarcopterygians (Chinese alligator and *Xenopus tropicalis* and



185 *laevis*) and actinopterygians (spotted gar) strongly suggested that *npm2a* and *npm2b* genes  
186 could have resulted from a unique local duplication of an ancestral *npm2* gene.

187

### 188 ***Evolutionary history of npm2 genes in vertebrates***

189 The presence/absence of *npm2a* and *npm2b* in the current vertebrate phyla and species  
190 is summarized in Fig.3, and we also propose an evolutionary scenario for the diversification  
191 of the *npm2* genes across vertebrate evolution.

192 In this study, we demonstrated that *npm2a* and *npm2b* may be paralogous genes  
193 present in the different vertebrate groups, chondrichthyans (Fig.1), sarcopterygians, and  
194 actinopterygians (Figs. 1 and 2), which strongly suggested that the *npm2* genes originated  
195 from a duplication event prior to the divergence of chondrichthyans and osteichthyans. Since  
196 the four *npm* family members (*npm1*, *npm2*, *npm3*, and *npm4*) are thought to be produced  
197 from the first two rounds of WGD (VGD1 & VGD2) that occurred early on in vertebrate  
198 evolution, we can thus hypothesize that the duplication event that generated *npm2a* and  
199 *npm2b* took place after VGD2, but before emergence of chondrichthyans and osteichthyans,  
200 between 450 and 500 million years ago (Mya) [25]. The findings from our synteny analysis  
201 demonstrated that in representative species of actinopterygians (spotted gar) and  
202 sarcopterygians (*Xenopus tropicalis* and *laevis* and Chinese alligator), *npm2a* and *npm2b*  
203 genes are at two distinct loci located on the same chromosomal region (Fig. 2). These results  
204 strongly suggested that *npm2a* and *npm2b* genes arose from local gene duplication rather than  
205 a whole genome (or chromosome) duplication event (Fig. 3).

206 The teleost ancestor experienced an extra WGD event (TGD) [21], but in all  
207 investigated teleosts, we observed a maximum of one *npm2a* ortholog and one *npm2b*  
208 ortholog (except in salmonids) (Fig. 1). In addition, *npm2a* and *npm2b* are located on two  
209 TGD ohnologous regions on chromosomes 8 and 10, respectively (Fig. 2), in zebrafish,

210 which is consistent with the loss of one of the *npm2a* duplicates from one region and the loss  
211 of one *npm2b* duplicate from the corresponding ohnologous region. Thus, *npm2* diversity is  
212 most likely due to the early loss of one of the two *npm2a* and *npm2b* TGD ohnologs (Fig. 3).  
213 This observation in zebrafish strengthened the hypothesis that TGD did not impact the *npm2a*  
214 and *npm2b* diversity in teleosts. In addition, the lack of *npm2a* and *npm2b* in neoteleostei  
215 species, such as tetraodon, suggested that additional gene losses occurred early in the  
216 evolutionary history of this group (Fig. 2).

217 In salmonids, we identified two *npm2b* paralogs, i.e. *npm2b1* and *npm2b2*, in all  
218 investigated salmonid species (Fig. 1). Considering the high sequence identity shared by  
219 *npm2b1* and *npm2b2*, it is strongly hypothesized that these duplicates originated from SaGD.  
220 In contrast, we identified only one *npm2a* gene in all investigated salmonids suggesting that  
221 SaGD did not have any impact on the current salmonid *npm2a* diversity mostly due to an  
222 early loss of the SaGD ohnolog of this gene (Fig. 3).

223 In addition to the early gene losses after WGD, various other independent and  
224 phylum-specific gene losses may have contributed to shape the current diversity of *npm2a*  
225 and *npm2b* in vertebrates. In fact, although both *npm2a* and *npm2b* have been globally  
226 conserved in sarcopterygians and actinopterygians, some phyla in each group lack at least one  
227 of the genes. In sarcopterygians, *npm2a* is conserved in amphibians such as *Xenopus*  
228 *tropicalis* and *laevis*, and in sauropsids such as Chinese alligator and chicken (Figs. 1-3). In  
229 contrast, we did not find any *npm2a* genes in the Coelacanth genome (Figs. 1-3), which could  
230 be due to the lower assembly quality of the concerned genomic region (see Supplemental  
231 Table S3), and in the mammalian genomes including human and mouse (Figs. 1-3), whose  
232 absence may have been due to the loss of this gene in the common ancestor of mammals. On  
233 the other hand, *npm2b* is conserved in most investigated species. In actinopterygians, *npm2a*  
234 and *npm2b* are both conserved in all investigated species except neoteleostei in which neither

235 *npm2a* nor *npm2b* is found. In contrast, one *npm2a* and two *npm2b*, i.e. *npm2b1* and *npm2b2*,  
236 are found in salmonids, representing to date the most important diversity of *npm2* genes in  
237 vertebrates (Figs. 1-3). Considering the essentialness of the *npm2* gene in embryonic  
238 development, its lack in some neoteleosteon species, such as Atlantic cod and medaka, raises  
239 the question on how evolution can cope with its loss. Further analyses of data from the  
240 Phylofish database [26] (data not shown) showed that *npm3* had the strongest homology to  
241 *npm2* and was predominantly expressed in the ovaries in medaka and cod which suggest that  
242 it could potentially compensate for *npm2* deficiency. In contrast, *npm3* does not show an  
243 ovarian-predominant expression in spotted gar and zebrafish, thus suggesting that its strong  
244 ovarian expression could be restricted to neoteleostei.

245

#### 246 ***Evolution of npm2a and npm2b coding sequences***

247 To examine the evolutionary adaptation of the *npm2* proteins, estimation of the ratio  
248 of substitution rates (dN/dS) between the paralogous *npm2a* and *npm2b* CDS for all of the  
249 species harbouring multiple *npm2* paralogs was performed (Supplemental Table S4). For all  
250 investigated species, the dN/dS values were well below 1, indicating that whilst *npm2a* and  
251 *npm2b* genes diverged approximately 500 Mya, they have remained under strong purifying  
252 selection and evolutionary pressure, which may have tended to conserve their distinct protein  
253 structures and functions. Thus, in this study, we found that Npm2a and Npm2b may have  
254 diverged from an ancient duplication and currently share low sequence identity, suggesting  
255 that they could have thus evolved with different roles, which were likely conserved through  
256 strong negative selection.

257

## 258 **Expression domains of Npm2a and Npm2b in vertebrates**

259           In order to investigate further the potential functions of Npm2a and Npm2b, we first  
260 explored the tissue distributions of both transcripts using two different approaches, qPCR and  
261 RNA-Seq, the latter of which was obtained from the Phylofish online database [26]. In  
262 zebrafish and *Xenopus tropicalis*, we observed that *npm2a* and *npm2b* were both  
263 predominantly expressed in the ovary, and to a lesser extent, the muscle, as well as in the  
264 zebrafish gills (Fig. 4A and 4B). We also demonstrated that *npm2a* and *npm2b* were  
265 predominantly expressed in the ovary of bowfin, elephantnose fish, panga, European eel,  
266 sweetfish, and northern pike (Fig. 4C to 4H). In the investigated salmonid species, brook  
267 trout and brown trout, *npm2a*, *npm2b1*, and *npm2b2* were also predominantly expressed in  
268 the ovary (Fig. 4I and 4J). In addition, *npm2* transcripts were expressed at a very low level in  
269 the testis of European eel, northern pike, and salmonid species (Fig. 4F, 4H, 4I, and 4J). In  
270 teleosts, *npm2a* mRNA levels globally tended to be lower than *npm2b* (or *npm2b1* and  
271 *npm2b2* for salmonids) (Fig. 4A and 4D-J). The clear ovarian-specific expression profiles of  
272 *npm2a* and *npm2b* transcripts were conserved in all investigated species, from teleosts to  
273 tetrapods. This is consistent with the *npm2b* mRNA profiles reported in the literature for  
274 mouse [14], cattle [27], *Xenopus tropicalis* [28], and zebrafish [8]. Despite the long passage  
275 of time since their divergence (approximately 500 Mya) [25] as demonstrated above, *npm2a*  
276 and *npm2b* appeared to have conserved their ovarian-specific expression profiles, which  
277 suggested that they both have roles in female reproduction and/or embryonic development.

278

## 279 ***Embryonic expression of npm2a and npm2b***

280           Thus, in order to delve deeper into their functions in reproduction and embryogenesis,  
281 we investigated *npm2a* and *npm2b* mRNA expression during oogenesis and early  
282 development in zebrafish. During zebrafish oogenesis, both *npm2a* and *npm2b* transcripts

283 were found at high levels in oocytes (Fig. 5A), and despite gradual decreases in the levels of  
284 both *npm2* during oogenesis, they still can be detected at reasonable amounts in the  
285 unfertilized egg (i.e. metaphase 2 oocyte) (Fig. 5B). Thereafter, *npm2a* and *npm2b* transcript  
286 levels progressively decreased during embryonic development after fertilization before  
287 reaching very low levels at 24 hours post-fertilization (hpf) (Fig. 5B). This suggests that both  
288 mRNAs are strictly maternal (i.e. not re-expressed by the zygote), which is consistent with  
289 previous studies on zebrafish *npm2a* and *npm2b* transcripts [8,29]. Their expression profiles  
290 are typical features of maternally-inherited mRNAs, which highly suggested that the novel  
291 *npm2a* is also a maternal-effect gene.

292

### 293 ***Peptidic domains of npm2 paralogs***

294 We further examined the functions of the Npm2 proteins by analysis of their protein  
295 domains. To date, only the role of *npm2b* has been investigated in *Xenopus tropicalis*  
296 [12,30,31], mouse [14,32], humans [33–35], cattle [27], and zebrafish [8]. As previously  
297 demonstrated, *npm2b* is a maternal-effect gene whose transcripts are accumulated in the  
298 growing oocyte and maternally-inherited by the zygote, where it functions as a histone  
299 chaperone to decondense sperm DNA as well as reorganize chromatin, thus, it has also been  
300 suggested to contribute to ZGA as well [8,14,27,28]. Npm2b is thought to be activated by  
301 various post-translational modifications and homo-pentamerisation [36], and subsequently  
302 interacts with chromatin by exchanging sperm-specific basic proteins with histones via its  
303 core domain and acidic tracts A1, A2 and A3 [34,37–42]. However, no data is available on  
304 the structure and function of Npm2a. Using a predictive approach, we identified the presence  
305 of the Npm core domain, acidic tract A1, and acidic tract A2 in the various investigated  
306 Npm2 sequences. The nucleoplasmin family is defined by the presence of an Npm core  
307 domain, which enables oligomerization of Npm proteins, in all of its members [38,43]. We

308 were able to predict the presence of this domain in all investigated Npm2a and Npm2b  
309 sequences (Supplemental Fig. S1), suggesting that Npm2a proteins could also form homo- or  
310 hetero-polymers. The acidic tract domains were demonstrated to facilitate histone binding by  
311 increasing the recognition and affinity for different histones [40,44]. Acidic tract A1 was  
312 demonstrated to be absent from most of the Npm2b investigated so far, except *Xenopus*  
313 *tropicalis* Npm2b, and acidic tract A2 was predicted to be in all investigated Npm2b apart  
314 from guinea pig Npm2b and American whitefish Npm2b1 (Supplemental Fig. S1). This  
315 strongly suggested that the histone and basic protein binding activity of Npm2b is mediated  
316 predominantly by acidic tract A2. On the other hand, in all investigated Npm2a proteins, we  
317 predicted an acidic tract A1 except in that of dogfish, zebrafish, and allis shad (Supplemental  
318 Fig. S1). In contrast, only half of the investigated Npm2a proteins harbored an acidic tract  
319 A2, which is additionally shorter than the one present in Npm2b proteins (Supplemental Fig.  
320 S1). Our results demonstrated that all Npm2a proteins, except those of Allis shad and  
321 dogfish, possess acidic tracts, which could potentially mediate histone and basic protein  
322 interactions.

323

#### 324 ***Functional analysis of npm2a and npm2b in zebrafish***

325 Lastly, we performed functional analysis of these two Npm2 proteins by genetic  
326 knockout using the CRISPR/cas9 system. One-cell staged embryos were injected with the  
327 CRISPR/cas9 guides that targeted either *npm2a* or *npm2b* and allowed to grow to adulthood.  
328 Mosaic founder mutant females (F0) were identified by fin clip genotyping and subsequently  
329 mated with wild-type (WT) males, and embryonic development of the F1 fertilized eggs was  
330 recorded. Since the mutagenesis efficiency of the CRISPR/cas9 system was very high, as  
331 previously described [45,46], the *npm2* genes were sufficiently knocked-out even in the  
332 transgenic mosaic F0 females. This was evidenced by the substantially lower transcript levels

333 of *npm2a* and *npm2b* in the F1 embryos as compared to those from control WT pairings  
334 (Fig.6A). Thus, the phenotypes of *npm2a* (n=3) and *npm2b* (n=4) mutants could be observed  
335 even in the F0 generation. Since none of the mutated genes were transmissible to future  
336 generations neither through the male nor the female, therefore, all of our observations were  
337 obtained from the F0 generation. We observed that most of the embryos from the *npm2b*  
338 mutant females underwent cellular division during the very early stages of development (1-3  
339 hpf) despite a considerable number of embryos with abnormal morphology ( $24.00\pm 7.84\%$   
340 versus 0% in controls) (Fig.6B), which included smaller size, enlarged yolk to membrane  
341 ratio, and small yolk to membrane ratio. The diameter of the embryo is demonstrated by the  
342 red dotted lines at oblong and germ ring stages, which reveal the extremely reduced size of  
343 *npm2a* embryos (Fig.6C). Notably, around two thirds of the embryos showed abnormal cell  
344 division, even in those with normal morphology, that culminated in developmental arrest at  
345 around 4 hpf following which the cells stopped dividing and appeared to regress. Thus, the  
346 developmental success at 4 hpf (oblong/sphere stage) was  $38.09\pm 7.31\%$  vs.  $85.09\pm 4.88\%$  in  
347 controls (Fig.6B and 6C [right column]). By the 24 somite stage (24 hpf), these embryos were  
348 all dead while the remaining embryos that showed normal development and normal cell  
349 division continued to progress normally. This finding corresponded to our previous results,  
350 which showed that *npm2b*-deficient embryos targeted by morpholino arrested at 4 hpf and  
351 eventually died [8].

352 On the other hand, *npm2a* mutant-derived embryos had a very low developmental  
353 success even at a very early stage of growth (1 hpf) ( $17.62\pm 5.06\%$  vs.  $85.09\pm 4.88\%$  in  
354 controls) as defined by a complete lack of cell division, and a large population of them  
355 ( $36.36\pm 6.98\%$  vs. 0% in controls) had an abnormal morphology (Fig.6B and 6C [middle  
356 columns]). The abnormal morphology of these embryos was similar to that found in *npm2b*-  
357 deficient embryos. The F1 embryos that did not undergo any cell division at 1 hpf continued

358 to display a complete lack of development at 64-cell, oblong, dome, germ ring, and finally  
359 somite stages (Fig.6B [middle columns]). Similar to the *npm2b* mutant-derived embryos, the  
360 *npm2a*-deficient embryos were all dead by 24 hpf while the remaining embryos that showed  
361 normal development and normal cell division continued to progress normally. This novel  
362 finding showed for the first time that *npm2a* is essential for early development of embryos,  
363 and is therefore a crucial maternal-effect gene. Further, we demonstrated that while *npm2a*  
364 and *npm2b* share similar tissue distribution, as both are found specifically in the ovaries and  
365 early stage embryos, their roles are distinct and essential to embryogenesis, and one could not  
366 compensate for the other. Notably, *npm2a* probably plays a major role at or immediately after  
367 fertilization since the embryos are arrested before the first mitotic division, which is in line  
368 with a role in sperm DNA decondensation since lack of proper processing of the paternal-  
369 derived DNA would lead to developmental arrest at the earliest stage and embryonic death. In  
370 contrast, *npm2b* appears to function at a later stage or other factors can replace its role in the  
371 early stages as the *npm2b*-deficient embryos are capable of dividing until around 4 hpf, which  
372 corresponds to previous reports [8,14]. These findings are in line with those demonstrated for  
373 other maternal-effect genes in mammals, such as *mater*, *floped*, *filia*, *tle6* [47], and *bcas2*  
374 [48] as well as in zebrafish, including *fue* [49] and *cellular atoll* [50], all of which function to  
375 moderate the early events of fertilization and embryogenesis and their ablation leads to arrest  
376 and mortality at the earliest stages of embryogenesis.

377 In consequence, the dominance of the mutant allele combined with the strong  
378 maternal effect of these genes, which led to massive early embryonic mortality such that none  
379 of the mutant carriers survived, very likely contributed to the lack of germline transmission of  
380 the mutations despite reported heritability rates of 10-30% in CRISPR/cas9-targeted zebrafish  
381 from previous studies [45,46]. This was supported by detection of the mutant allele via PCR  
382 genotyping in the genome of F1 *npm2a*- and *npm2b*-deficient embryos that were



383 developmentally-arrested at the germ ring stage, but not in the surviving animals at 24 hpf  
384 (Supplemental Fig.S2).

385

## 386 **Conclusions**

387         Since two annotated genes corresponding to *npm2*, which is known as an essential  
388 maternal-effect gene in mammals and amphibians, were recently found in zebrafish, we set  
389 out to investigate their evolution and function. In this study, we demonstrated that the two  
390 duplicates of *npm2*, *npm2a* and *npm2b*, exist in a wide range of vertebrate species, including  
391 ray-finned fish, amphibians, and bird. We also found that the mammalian *npm2* gene is in  
392 fact an ortholog of *npm2b*. Using phylogeny and synteny analyses, we traced the origins of  
393 those two duplicates to the early stages of vertebrate evolution. Our findings indicate that  
394 *npm2a* and *npm2b* genes resulted from a local gene duplication that may have occurred  
395 between VGD2 and the divergence of ray-finned fish and tetrapods (~450-500 Mya). This  
396 ancient origin is in line by the low sequence identity between the two *npm2* genes, although  
397 the main protein domains remain conserved. Both genes exhibit a strict ovarian expression  
398 and corresponding transcripts are maternally-inherited in fish and amphibians. Moreover, we  
399 demonstrated and confirmed by CRISPR/cas9-directed genetic knockout of *npm2a* and  
400 *npm2b* that they are both maternal-effect genes that play essential, but distinct, roles in early  
401 embryogenesis. *npm2a* probably plays a major role at or immediately after fertilization, and  
402 most likely in chromatin sperm decondensation. In contrast, *npm2b* appears to function at a  
403 later stage and could participate in ZGA. Our findings will help us gain further insight into  
404 the evolutionary diversity of maternal-effect genes and understand the underlying  
405 mechanisms that contribute to reproductive success in vertebrates.

406

407

## 408 **Material and Methods**

### 409 ***Genomic databases***

410 The following genomic data were extracted and investigated from the ENSEMBL genomic  
411 database (<http://www.ensembl.org/index.html>): human, *Homo sapiens*; mouse, *Mus*  
412 *musculus*; chicken, *Gallus gallus*; *Xenopus*, *Xenopus tropicalis*; coelacanth, *Latimeria*  
413 *chalumnae*; spotted gar, *Lepisosteus oculatus*; zebrafish, *Danio rerio*; and tetraodon,  
414 *Tetraodon nigroviridis*. The Chinese alligator (*Alligator sinensis*) genome was extracted and  
415 investigated from the NCBI genomic database (<http://www.ncbi.nlm.nih.gov/genome/22419>).  
416 The *Xenopus laevis* L and S genomes were analyzed from the Xenbase database  
417 ([www.xenbase.org](http://www.xenbase.org)).

### 418 ***Transcriptomic databases***

419 The following actinopterygian transcriptomes were retrieved and investigated from the  
420 Phylofish database (<http://phylofish.sigene.org/index.html>): bowfin, *Amia calva*; spotted gar,  
421 *Lepisosteus oculatus*; elephantnose fish, *Gnathonemus petersi*; arowana, *Osteoglossum*  
422 *bicirrhosum*; butterflyfish, *Pantodon buchholzi*; European eel, *Anguilla anguilla*; rainbow  
423 trout, *Oncorhynchus mykiss*; allis shad, *Alosa alosa*; zebrafish, *Danio rerio*; panga,  
424 *Pangasius hypophthalmus*; northern pike, *Esox lucius*; grayling, *Thymallus thymallus*;  
425 Atlantic cod, *Gadhus morua*; medaka, *Oryzias latipes*; European perch, *Perca fluviatilis*;  
426 brown trout, *Salmo trutta*; European whitefish, *Coregonus lavaretus*; brook trout, *Salvelinus*  
427 *fontinalis*; Astyanax, *Astyanax mexicanus*; lake whitefish, *Coregonus clupeaformis*; eastern  
428 mudminnow, *Umbra pygmae*, and sweetfish, *Plecoglossus altivelis*.

### 429 ***Gene predictions***

#### 430 **TBLASTN search**

431 Genomic data were analyzed using the TBLASTN algorithm (search sensitivity: near exact  
432 match short) on the ENSEMBL website or the NCBI browser for the Chinese alligator

433 genome. The TBLASTN algorithm on the SIGENAE platform was used on the  
434 transcriptomic data.

#### 435 Predictions of *npm2* genes

436 The peptidic sequences of zebrafish Npm2a and Npm2b were used as query in TBLASTN  
437 search to identify the open reading frame (ORF) encoding *npm2* genes in the various  
438 investigated genomes and transcriptomes.

#### 439 ***Phylogenetic analysis***

440 Amino acid sequences of 75 Npm2, 3 Npm3, and 3 Npm1 proteins were first aligned using  
441 ClustalW. The JTT (Jones, Taylor, and Thornton) protein substitution matrix of the resulting  
442 alignments was determined using ProTest software. Phylogenetic analysis of Npm proteins  
443 was performed using the Maximum Likelihood method (MEGA 5.1 software) with 1,000  
444 bootstrap replicates.

#### 445 ***Synteny analyses***

446 Synteny maps of the conserved genomic regions in human, mouse, chicken, *Xenopus*,  
447 coelacanth, spotted gar, zebrafish, and tetraodon were produced using PhyloView on the  
448 Genomicus v75.01 website ([http://www.genomicus.biologie.ens.fr/genomicus-75.01/cgi-](http://www.genomicus.biologie.ens.fr/genomicus-75.01/cgi-bin/search.pl)  
449 [bin/search.pl](http://www.genomicus.biologie.ens.fr/genomicus-75.01/cgi-bin/search.pl)). Synteny analysis of the Chinese alligator conserved genomic regions was  
450 performed using TBLASTN searches in the corresponding genomic database. For each gene,  
451 the peptidic sequences of human and chicken were used as query, as far as they were  
452 referenced in the databases.

#### 453 ***RNA-seq***

454 RNA-seq data were deposited into Sequence Read Archive (SRA) of NCBI under accession  
455 references SRP044781-84, SRP045138, SRP045098-103, and SRP045140-146. The  
456 construction of sequencing libraries, data capture and processing, sequence assembly,  
457 mapping, and interpretation of read counts were all performed as previously reported with

458 some modifications [26]. In order to study the transcript expression patterns and levels of  
459 *npm2* for each actinopterygian species presenting 2 or 3 *npm2* genes, we mapped the double  
460 stranded RNA-seq reads to the corresponding *npm2* CDS using BWA-Bowtie with stringent  
461 mapping parameters (maximum number of allowed mismatches –aln 2). Mapped reads were  
462 counted using the idxstat command in SAMtools, with a minimum alignment quality value (–  
463 q 30) to discard ambiguous mapping reads. For each species, the number of mapped reads  
464 was then normalized for each *npm2* gene across the 11 tissues using RPKM normalization.

#### 465 ***Quantitative real-time PCR (QPCR)***

466 For each sample, total RNA was extracted using Tri-Reagent (Molecular Research Center,  
467 Cincinnati, OH) according to the manufacturer’s instructions. Reverse transcription (RT) was  
468 performed using 1 µg of RNA from each sample with M-MLV reverse transcriptase and  
469 random hexamers (Promega, Madison, WI). Briefly, RNA and dNTP were denatured for  
470 6 min at 70°C and then chilled on ice for 5 min before addition of the RT reagents. RT was  
471 performed at 37°C for 1 h and 15 min followed by a 15-min incubation step at 70°C. Control  
472 reactions were run without reverse transcriptase and used as negative control in the QPCR  
473 study. For each studied tissue, cDNA originating from three individual fish were pooled and  
474 subsequently used for QPCR. Follicular oocytes at different stages of oogenesis were  
475 obtained from at least 3 different wildtype animals, and pooled embryos were obtained from  
476 at least 3 clutches from each individual mutant. QPCR experiments were performed with the  
477 Fast-SYBR GREEN fluorophore kit (Applied Biosystems, Foster City, CA) as per the  
478 manufacturer’s instructions using 200 nM of each primer in order to keep PCR efficiency  
479 between 90% and 100%, and an Applied Biosystems StepOne Plus instrument. RT products,  
480 including control reactions, were diluted 1/25, and 4 µl of each sample were used for each  
481 PCR. All QPCR were performed in triplicate. The relative abundance of target cDNA was  
482 calculated from a standard curve of serially diluted pooled cDNA and normalized to 18S, β-

483 actin,  $\beta$ -2 microglobulin, and EF1 $\alpha$  transcripts. The primer sequences can be found in  
484 Supplemental Table S5.

#### 485 ***Comparison of npm2a and npm2b peptidic sequences***

486 For the species harbouring Npm2a and Npm2b, or Npm2a, Npm2b1, and Npm2b2, we  
487 compared the corresponding protein sequences using EMBOSS Matcher tool on the EBI  
488 website ([http://www.ebi.ac.uk/Tools/psa/emboss\\_matcher/](http://www.ebi.ac.uk/Tools/psa/emboss_matcher/)). Results of the pair-wise  
489 comparisons are presented as identity percentages in Supplemental Table S2. We also  
490 estimated the synonymous substitution rates (dS) and non-synonymous substitution rates  
491 (dN) between the paralogous Npm2a and Npm2b coding sequences (CDS) using JCoDA  
492 v1.14 software (<http://www.tcnj.edu/~nayaklab/jcoda>). The alignment options were set to  
493 “clustal”, and the Yang and Nielsen dN/dS substitution models were used.

#### 494 ***CrispR-cas9 genetic knockout***

495 CRISPR/cas9 guide RNA (gRNA) were designed using the ZiFiT online software and were  
496 made against 3 targets within each gene to generate large genomic deletions, ranging from  
497 250-1600 base pairs, that span exons which allow the formation of non-functional proteins.  
498 Nucleotide sequences containing the gRNA were ordered, annealed together, and cloned into  
499 the DR274 plasmid. *In vitro* transcription of the gRNA from the T7 initiation site was  
500 performed using the Maxiscript T7 kit (Applied Biosystems), and their purity and integrity  
501 were assessed using the Agilent RNA 6000 Nano Assay kit and 2100 Bioanalyzer (Agilent  
502 Technologies, Santa Clara, CA). Zebrafish embryos at the one-cell stage were micro-injected  
503 with approximately 30-40 pg of each CRISPR/cas9 guide along with 8-9 nM of purified cas9  
504 protein (a generous gift from Dr. Anne de Cian from the National Museum of Natural History  
505 in Paris, France). The embryos were allowed to grow to adulthood, and genotyped using fin  
506 clip and PCR that detected the deleted regions. The PCR bands of the mutants were then sent  
507 for sequencing to verify the deletion. Once confirmed, the mutant females were mated with

508 wildtype males to produce F1 embryos, whose phenotypes were subsequently recorded.  
509 Images were captured with a Carl Zeiss microscope (Jena, Germany) and TouPCam camera  
510 (TouPTek, Hangzhou, China).

### 511 ***Genotyping by PCR***

512 Fin clips were harvested from animals under anesthesia (0.1% phenoxyethanol) and lysed  
513 with 5% chelex containing 100 µg of proteinase K at 55°C for 2 hrs and then 99°C for 10  
514 minutes. The extracted DNA was subjected to PCR using Advantage2 system (Clontech,  
515 Mountain View, CA) for *npm2b* and Jumpstart Taq polymerase (Sigma-Aldrich, St. Louis,  
516 MO) for *npm2a*. The primers are listed in Supplemental Table S5.

### 517 ***Statistical Analysis***

518 Comparison of two groups was performed using the GraphPad Prism statistical software (La  
519 Jolla, CA), and either the Student's t-test or Mann-Whitney U-test was conducted depending  
520 on the normality of the groups based on the Anderson-Darling test.

521

522

### 523 **Acknowledgements**

524 This work was supported by ANR grants PHYLOFISH (ANR-10-GENM-017) and  
525 Maternal Legacy (ANR-13-BSV7-0015) to JB. Authors would like to thank Dr. Yann Audic  
526 for providing *Xenopus tropicalis* animals and Ms. Amélie Patinote for zebrafish rearing and  
527 egg production.

528

529

### 530 **References**

531 1. Baroux C, Autran D, Gillmor CS, Grimanelli D, Grossniklaus U. The maternal to  
532 zygotic transition in animals and plants. *Cold Spring Harb Symp Quant Biol.* 2008;73:

- 533 89–100.
- 534 2. Lindeman RE, Pelegri F. Vertebrate maternal-effect genes: Insights into fertilization,  
535 early cleavage divisions, and germ cell determinant localization from studies in the  
536 zebrafish. *Mol Reprod Dev.* 2010;77: 299–313.
- 537 3. Lee MT, Bonneau AR, Takacs CM, Bazzini AA, DiVito KR, Fleming ES, et al.  
538 *Nanog*, *Pou5f1* and *SoxB1* activate zygotic gene expression during the maternal-to-  
539 zygotic transition. *Nature.* 2013;503: 360–364.
- 540 4. Giraldez AJ, Mishima Y, Rihel J, Grocock RJ, Van Dongen S, Inoue K, et al.  
541 Zebrafish MiR-430 promotes deadenylation and clearance of maternal mRNAs.  
542 *Science.* 2006;312: 75–79.
- 543 5. Giraldez AJ. microRNAs, the cell’s Nepenthe: clearing the past during the maternal-  
544 to-zygotic transition and cellular reprogramming. *Curr Opin Genet Dev.* 2010; 20:369–  
545 375.
- 546 6. Lund E, Liu M, Hartley RS, Sheets MD, Dahlberg JE. Deadenylation of maternal  
547 mRNAs mediated by miR-427 in *Xenopus laevis* embryos. *Rna.* 2009;15: 2351–2363.
- 548 7. Bouchareb A, Le Cam A, Montfort J, Gay S, Nguyen T, Bobe J, et al. Genome-wide  
549 identification of novel ovarian-predominant miRNAs: new insights from the medaka  
550 (*Oryzias latipes*). *Sci Rep.* 2017;7: 40241.
- 551 8. Bouleau A, Desvignes T, Traverso JM, Nguyen T, Chesnel F, Fauvel C, et al.  
552 Maternally inherited *npm2* mRNA is crucial for egg developmental competence in  
553 zebrafish. *Biol Reprod.* 2014;91: 43.
- 554 9. Laskey RA, Honda BM, Mills AD, Finch JT. Nucleosomes are assembled by an acidic  
555 protein which binds histones and transfers them to DNA. *Nature.* 1978;275: 416–420.
- 556 10. Laskey RA, Earnshaw WC. Nucleosome assembly. *Nature.* 1980;286: 763–767.
- 557 11. Mills AD, Laskey RA, Black P, De Robertis EM. An acidic protein which assembles

- 558 nucleosomes in vitro is the most abundant protein in *Xenopus* oocyte nuclei. *J Mol*  
559 *Biol.* 1980;139: 561–568.
- 560 12. Philpott A, Leno GH, Laskey RA. Sperm decondensation in *Xenopus* egg cytoplasm is  
561 mediated by nucleoplasmin. *Cell.* 1991;65: 569–578.
- 562 13. Philpott A, Leno GH. Nucleoplasmin remodels sperm chromatin in *Xenopus* egg  
563 extracts. *Cell.* 1992;69: 759–767.
- 564 14. Burns KH, Viveiros MM, Ren Y, Wang P, DeMayo FJ, Frail DE, et al. Roles of  
565 NPM2 in chromatin and nucleolar organization in oocytes and embryos. *Science.*  
566 2003;300: 633–636.
- 567 15. Dehal P, Boore JL. Two rounds of whole genome duplication in the ancestral  
568 vertebrate. *PLoS Biol.* 2005;3: e314.
- 569 16. Van de Peer Y, Maere S, Meyer A. The evolutionary significance of ancient genome  
570 duplications. *Nat Rev Genet.* 2009;10: 725–732.
- 571 17. Eirin-Lopez JM, Frehlick LJ, Ausio J. Long-term evolution and functional  
572 diversification in the members of the nucleophosmin/nucleoplasmin family of nuclear  
573 chaperones. *Genetics.* 2006;173: 1835–1850.
- 574 18. Frehlick LJ, Eirin-Lopez JM, Jeffery ED, Hunt DF, Ausio J. The characterization of  
575 amphibian nucleoplasmins yields new insight into their role in sperm chromatin  
576 remodeling. *BMC Genomics.* 2006;7: 99.
- 577 19. Wotton KR, Weierud FK, Dietrich S, Lewis KE. Comparative genomics of Lbx loci  
578 reveals conservation of identical Lbx ohnologs in bony vertebrates. *BMC Evol Biol.*  
579 2008;8: 171.
- 580 20. Jovelin R, Yan YL, He X, Catchen J, Amores A, Canestro C, et al. Evolution of  
581 developmental regulation in the vertebrate FgfD subfamily. *J Exp Zool B Mol Dev*  
582 *Evol.* 2010;314: 33–56.



- 583 21. Glasauer SM, Neuhauss SC. Whole-genome duplication in teleost fishes and its  
584 evolutionary consequences. *Mol Genet Genomics*. 2014;289: 1045–1060.
- 585 22. Volff JN. Genome evolution and biodiversity in teleost fish. *Heredity (Edinb)*.  
586 2005;94: 280–294.
- 587 23. Berthelot C, Brunet F, Chalopin D, Juanchich A, Bernard M, Noel B, et al. The  
588 rainbow trout genome provides novel insights into evolution after whole-genome  
589 duplication in vertebrates. *Nat Commun*. 2014;5: 3657.
- 590 24. Session AM, Uno Y, Kwon T, Chapman JA, Toyoda A, Takahashi S, et al. Genome  
591 evolution in the allotetraploid frog *Xenopus laevis*. *Nature*. 2016;538: 336–343.
- 592 25. Near TJ, Eytan RI, Dornburg A, Kuhn KL, Moore JA, Davis MP, et al. Resolution of  
593 ray-finned fish phylogeny and timing of diversification. *Proc Natl Acad Sci U S A*.  
594 2012;109: 13698–13703.
- 595 26. Pasquier J, Cabau C, Nguyen T, Jouanno E, Severac D, Braasch I, et al. Gene  
596 evolution and gene expression after whole genome duplication in fish: the PhyloFish  
597 database. *BMC Genomics*. 2016;17: 368.
- 598 27. Lingenfelter BM, Tripurani SK, Tejomurtula J, Smith GW, Yao J. Molecular cloning  
599 and expression of bovine nucleoplasmin 2 (NPM2): a maternal effect gene regulated  
600 by miR-181a. *Reprod Biol Endocrinol*. 2011;9: 40.
- 601 28. Burglin TR, Mattaj IW, Newmeyer DD, Zeller R, De Robertis EM. Cloning of  
602 nucleoplasmin from *Xenopus laevis* oocytes and analysis of its developmental  
603 expression. *Genes Dev*. 1987;1: 97–107.
- 604 29. Harvey SA, Sealy I, Kettleborough R, Fenyes F, White R, Stemple D, et al.  
605 Identification of the zebrafish maternal and paternal transcriptomes. *Development*.  
606 2013;140: 2703–2710.
- 607 30. Laskey RA, Mills AD, Philpott A, Leno GH, Dilworth SM, Dingwall C. The role of

- 608 nucleoplasmin in chromatin assembly and disassembly. *Philos Trans R Soc Lond B*  
609 *Biol Sci.* 1993;339: 263–269.
- 610 31. Prado A, Ramos I, Frehlick LJ, Muga A, Ausio J. Nucleoplasmin: a nuclear chaperone.  
611 *Biochem Cell Biol.* 2004;82: 437–445.
- 612 32. De La Fuente R, Viveiros MM, Burns KH, Adashi EY, Matzuk MM, Eppig JJ. Major  
613 chromatin remodeling in the germinal vesicle (GV) of mammalian oocytes is  
614 dispensable for global transcriptional silencing but required for centromeric  
615 heterochromatin function. *Dev Biol.* 2004;275: 447–458.
- 616 33. Lee HH, Kim HS, Kang JY, Lee BI, Ha JY, Yoon HJ, et al. Crystal structure of human  
617 nucleophosmin-core reveals plasticity of the pentamer-pentamer interface. *Proteins.*  
618 2007;69: 672–678.
- 619 34. Platonova O, Akey I V, Head JF, Akey CW. Crystal structure and function of human  
620 nucleoplasmin (npm2): a histone chaperone in oocytes and embryos. *Biochemistry.*  
621 2011;50: 8078–8089.
- 622 35. Okuwaki M, Sumi A, Hisaoka M, Saotome-Nakamura A, Akashi S, Nishimura Y, et  
623 al. Function of homo- and hetero-oligomers of human nucleoplasmin/nucleophosmin  
624 family proteins NPM1, NPM2 and NPM3 during sperm chromatin remodeling.  
625 *Nucleic Acids Res.* 2012;40: 4861–4878.
- 626 36. Onikubo T, Nicklay JJ, Xing L, Warren C, Anson B, Wang WL, et al.  
627 Developmentally Regulated Post-translational Modification of Nucleoplasmin  
628 Controls Histone Sequestration and Deposition. *Cell Rep.* 2015. pii:S2211-  
629 1247(15)00196-5. doi: 10.1016/j.celrep.2015.02.038.
- 630 37. Dingwall C, Dilworth SM, Black SJ, Kearsey SE, Cox LS, Laskey RA. Nucleoplasmin  
631 cDNA sequence reveals polyglutamic acid tracts and a cluster of sequences  
632 homologous to putative nuclear localization signals. *Embo J.* 1987;6: 69–74.

- 633 38. Dutta S, Akey I V, Dingwall C, Hartman KL, Laue T, Nolte RT, et al. The crystal  
634 structure of nucleoplasmin-core: implications for histone binding and nucleosome  
635 assembly. *Mol Cell*. 2001;8: 841–853.
- 636 39. Banuelos S, Hierro A, Arizmendi JM, Montoya G, Prado A, Muga A. Activation  
637 mechanism of the nuclear chaperone nucleoplasmin: role of the core domain. *J Mol*  
638 *Biol*. 2003;334: 585–593.
- 639 40. Salvany L, Chiva M, Arnan C, Ausio J, Subirana JA, Saperas N. Mutation of the small  
640 acidic tract A1 drastically reduces nucleoplasmin activity. *FEBS Lett*. 2004;576: 353–  
641 357.
- 642 41. Taneva SG, Banuelos S, Falces J, Arregi I, Muga A, Konarev P V, et al. A mechanism  
643 for histone chaperoning activity of nucleoplasmin: thermodynamic and structural  
644 models. *J Mol Biol*. 2009;393: 448–463.
- 645 42. Fernandez-Rivero N, Franco A, Velazquez-Campoy A, Alonso E, Muga A, Prado A. A  
646 Quantitative Characterization of Nucleoplasmin/Histone Complexes Reveals  
647 Chaperone Versatility. *Sci Rep*. 2016;6: 32114.
- 648 43. Namboodiri VM, Akey I V, Schmidt-Zachmann MS, Head JF, Akey CW. The  
649 structure and function of *Xenopus* NO38-core, a histone chaperone in the nucleolus.  
650 *Structure*. 2004;12: 2149–2160.
- 651 44. Ramos I, Fernandez-Rivero N, Arranz R, Aloria K, Finn R, Arizmendi JM, et al. The  
652 intrinsically disordered distal face of nucleoplasmin recognizes distinct  
653 oligomerization states of histones. *Nucleic Acids Res*. 2014;42: 1311–1325.
- 654 45. Auer TO, Duroure K, De Cian A, Concordet JP, Del Bene F. Highly efficient  
655 CRISPR/Cas9-mediated knock-in in zebrafish by homology-independent DNA repair.  
656 *Genome Res*. 2014;24: 142–153.
- 657 46. Gagnon JA, Valen E, Thyme SB, Huang P, Akhmetova L, Pauli A, et al. Efficient

- 658 mutagenesis by Cas9 protein-mediated oligonucleotide insertion and large-scale  
659 assessment of single-guide RNAs. *PLoS One*. 2014;9: e98186.
- 660 47. Li L, Baibakov B, Dean J. A subcortical maternal complex essential for  
661 preimplantation mouse embryogenesis. *Dev Cell*. 2008;15: 416–425.
- 662 48. Xu Q, Wang F, Xiang Y, Zhang X, Zhao ZA, Gao Z, et al. Maternal BCAS2 protects  
663 genomic integrity in mouse early embryonic development. *Development*. 2015;142:  
664 3943–3953.
- 665 49. Dekens MP, Pelegri FJ, Maischein HM, Nusslein-Volhard C. The maternal-effect gene  
666 futile cycle is essential for pronuclear congression and mitotic spindle assembly in the  
667 zebrafish zygote. *Development*. 2003;130: 3907–3916.
- 668 50. Yabe T, Ge X, Pelegri F. The zebrafish maternal-effect gene cellular atoll encodes the  
669 centriolar component sas-6 and defects in its paternal function promote whole genome  
670 duplication. *Dev Biol*. 2007;312: 44–60.
- 671 51. Kimmel CB, Ballard WW, Kimmel SR, Ullmann B, Schilling TF. Stages of embryonic  
672 development of the zebrafish. *Dev Dyn*. 1995;203: 253–310.

673

674

## 675 **Figure legends**

### 676 **Figure 1: Consensus phylogenetic tree of Npm2 proteins.**

677 This phylogenetic tree was constructed based on the amino acid sequences of Npm2 proteins  
678 (for the references of each sequence see Supplemental Table S1) using the Neighbour Joining  
679 method with 1,000 bootstrap replicates. The number shown at each branch node indicates the  
680 bootstrap value (%). The tree was rooted using Npm3 and Npm1 sequences. The Npm2a  
681 sequences are in blue, the Npm2b sequences are in red, the salmonid Npm2b1 sequences are  
682 in purple, and the salmonid Npm2b2 sequences are in pink.

683 **Figure 2: Conserved genomic synteny of *npm2* genes.**

684 Genomic synteny maps comparing the orthologs of *npm2a*, *npm2b*, and their neighbouring  
685 genes. *npm2* genes are named as *npm2a* and *npm2b* (formerly known as *npm2*). The other  
686 genes were named after their human orthologs according to the Human Genome Naming  
687 Consortium (HGNC). Orthologs of each gene are shown in the same color. The direction of  
688 arrows indicates the gene orientation, with the ID of the genomic segment indicated above  
689 and the position of the gene (in  $10^6$  base pairs) indicated below. The full gene names and  
690 detailed genomic locations are given in Supplemental Table S3.

691 **Figure 3: Current status and proposed evolutionary history of *npm2* genes among**  
692 **gnathostomes.**

693 The names of the current representative species of each phylum are given at the end of the  
694 final branches, together with a red and/or blue X to denote the *npm2* genes they possess  
695 (*npm2a*=red, *npm2b*=blue). The black X upon an *npm2* gene symbol indicates a gene loss.  
696 LGD: local gene duplication; TGD: teleost-specific whole genome duplication; SaGD:  
697 salmonid-specific whole genome duplication.

698 **Figure 4: Tissue distribution of *npm2a* and *npm2b* in different species.**

699 **(A)** Tissue expression analysis by QPCR of *npm2a* and *npm2b* mRNAs in zebrafish and  
700 *Xenopus*. **(B)** Expression level is expressed as a percentage of the expression in the ovary for  
701 the most expressed gene. Data were normalized using *18S* expression. **(C-J)** Tissue  
702 expression level by RNA-Seq of *npm2a* and *npm2b* mRNAs in different fish species. mRNA  
703 levels are expressed in read per kilobase per million reads (RPKM). In salmonids **(I and J)**,  
704 the two 4R isoforms of *npm2b* are *npm2b1* and *npm2b2*. Br, brain ; Gi, gills ; Lu, lung ; In,  
705 intestine ; Li, liver ; Mu, muscle ; He, heart ; Bo, bone ; Ki, kidney ; Ov, ovary ; and Te,  
706 testis.

707 **Figure 5: *npm2a* and *npm2b* expression during oogenesis and early development.**

708 QPCR analysis of (A) *npm2a* and (B) *npm2b* expression during oogenesis and early  
709 embryonic development in zebrafish. Data were normalized using luciferase, and relative  
710 expression was based on *npm2b* expression at the indicated stage. UF, unfertilized egg; hpf,  
711 hours post-fertilization.

712 **Figure 6: CRISPR/cas9 knockout of *npm2a* and *npm2b* in zebrafish.**

713 (A) Relative expression level of *npm2a* and *npm2b* transcripts by QPCR in the fertilized  
714 zebrafish eggs from crosses between *npm2a* or *npm2b* mutant female and wildtype (WT)  
715 male, respectively. (B) Developmental success as measured by the proportion of fertilized  
716 eggs that underwent normal cell division and reached normal developmental milestones  
717 based on Kimmel et al. [51] from crosses between WT animals (control), and *npm2a* or  
718 *npm2b* mutant female and WT male at 1 and 4 hours post-fertilization (hpf). Shaded grey  
719 columns denote normal morphology and black columns denote abnormal morphology of the  
720 fertilized eggs at 1 hpf. (C) Representative images demonstrating development of fertilized  
721 eggs from crosses between control animals (left panels), and *npm2a* (middle panels) or  
722 *npm2b* (right panels) mutant female and WT male at 64-cell, oblong, dome, germ ring, and  
723 24-somite stages according to Kimmel et al [51]. N=3 for *npm2a* mutant and N=4 for *npm2b*  
724 mutant. All assessments were performed from at least 3 clutches from each mutant. Scale  
725 bars denote 500 nm. Red dotted lines define the diameter of the embryo. \*\* p<0.01,  
726 \*\*\*p<0.001, \*\*\*\*p<<0.0001

727 **Supplemental Figure S1: Npm2a and Npm2b protein domain conservation.**

728 Presence of the Npm core (red color bar) and acidic tract (blue color bar) domains in *npm2a*  
729 and *npm2b* types in various vertebrate species.

730 **Supplemental Figure S2: Genotyping by PCR for *npm2a* and *npm2b* in F1 embryos.**

731 *npm2a* and *npm2b* knockout animals were crossed with wildtype (WT) zebrafish, and  
732 individual F1 embryos were harvested at 6 hours post-fertilization and subjected to

733 genotyping by PCR with gene-specific primers. The wildtype PCR product for *npm2a* was  
734 1634 base pairs (bp) and the CRISPR/cas9-targeted knockout mutant band was 240 bp while  
735 the WT *npm2b* band was 813 bp and the CRISPR/cas9-targeted knockout mutant band was  
736 560 bp. The yellow asterisks denote the embryos carrying the mutant allele.

737 **Supplementary Data**

738 **Supplemental Table S1:** list of Npm2 protein sequences used in the phylogenetic analysis.

739 **Supplemental Table S2:** Npm2a and Npm2b protein sequence comparisons.

740 **Supplemental Table S3:** list of the genes from the conserved syntenic region of *npm2* genes.

741 **Supplemental Table S4:** Estimation of the ratio of substitution rates (dN/dS) in *npm2a* and  
742 *npm2b* genes.

743 **Supplemental Table S5:** QPCR and PCR primers.

744 **Supplemental Fig.S1:** Npm2a and Npm2b protein domain conservation.

745 **Supplemental Fig.S2:** Genotyping of F1 embryos from *npm2a* and *npm2b* mutants.

# Figure 1

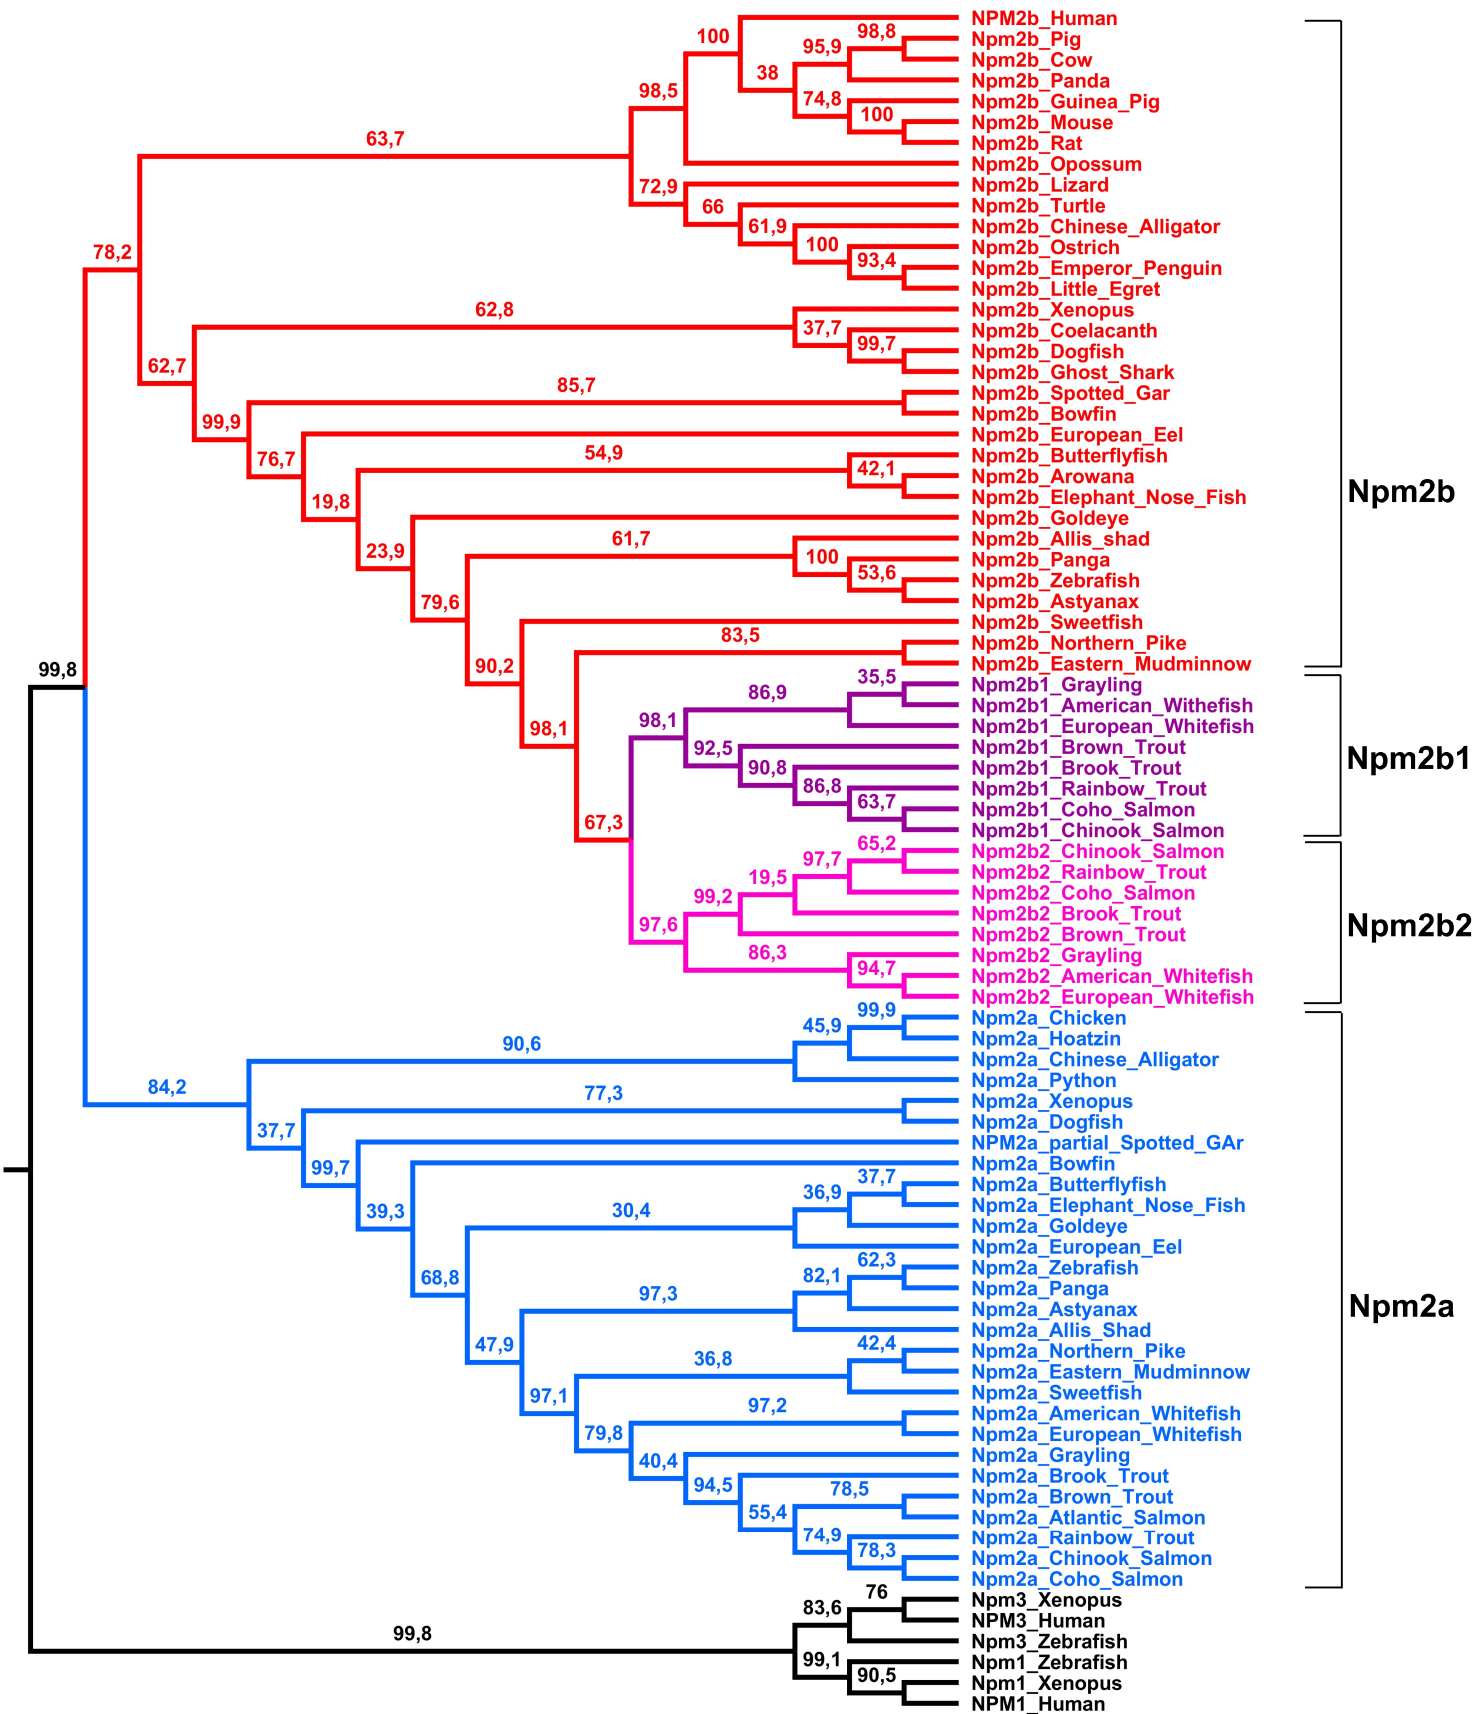



# Figure 2

bioRxiv preprint doi: <https://doi.org/10.1101/104760>; this version posted May 22, 2017. The copyright holder for this preprint (which was not certified by peer review) is the author/funder, who has granted bioRxiv a license to display the preprint in perpetuity. It is made available under aCC-BY-NC-ND 4.0 International license.

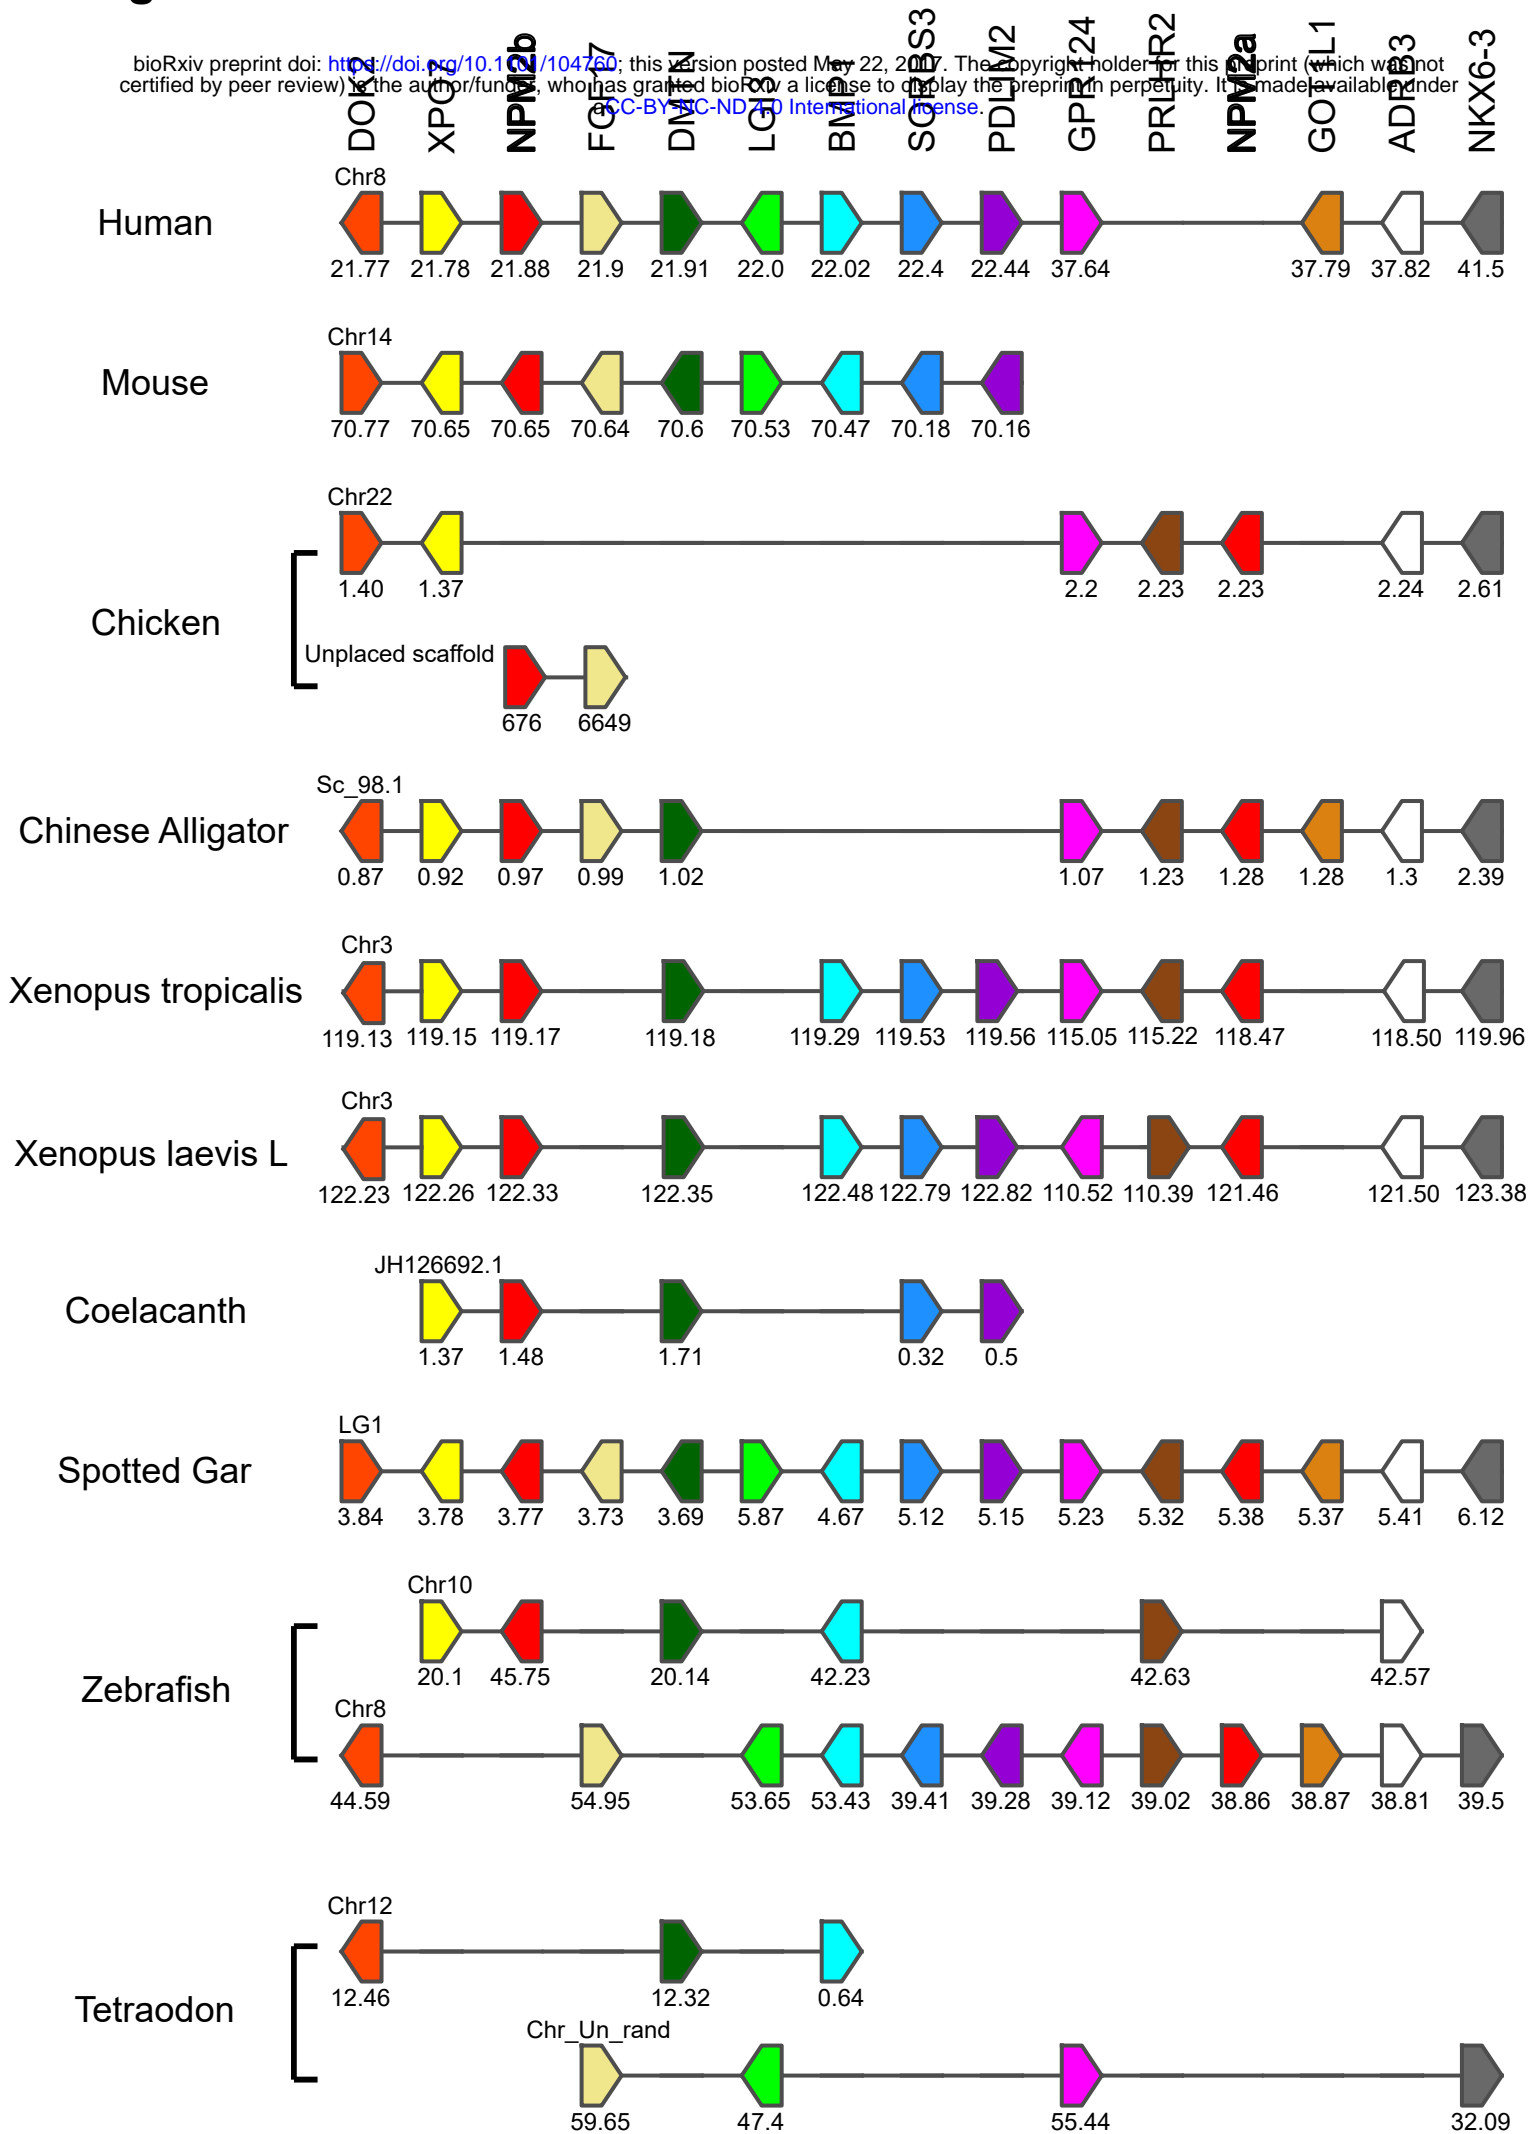

# Figure 3

bioRxiv preprint doi: <https://doi.org/10.1101/104760>; this version posted May 22, 2017. The copyright holder for this preprint (which was not certified by peer review) is the author/funder, who has granted bioRxiv a license to display the preprint in perpetuity. It is made available under aCC-BY-NC-ND 4.0 International license.

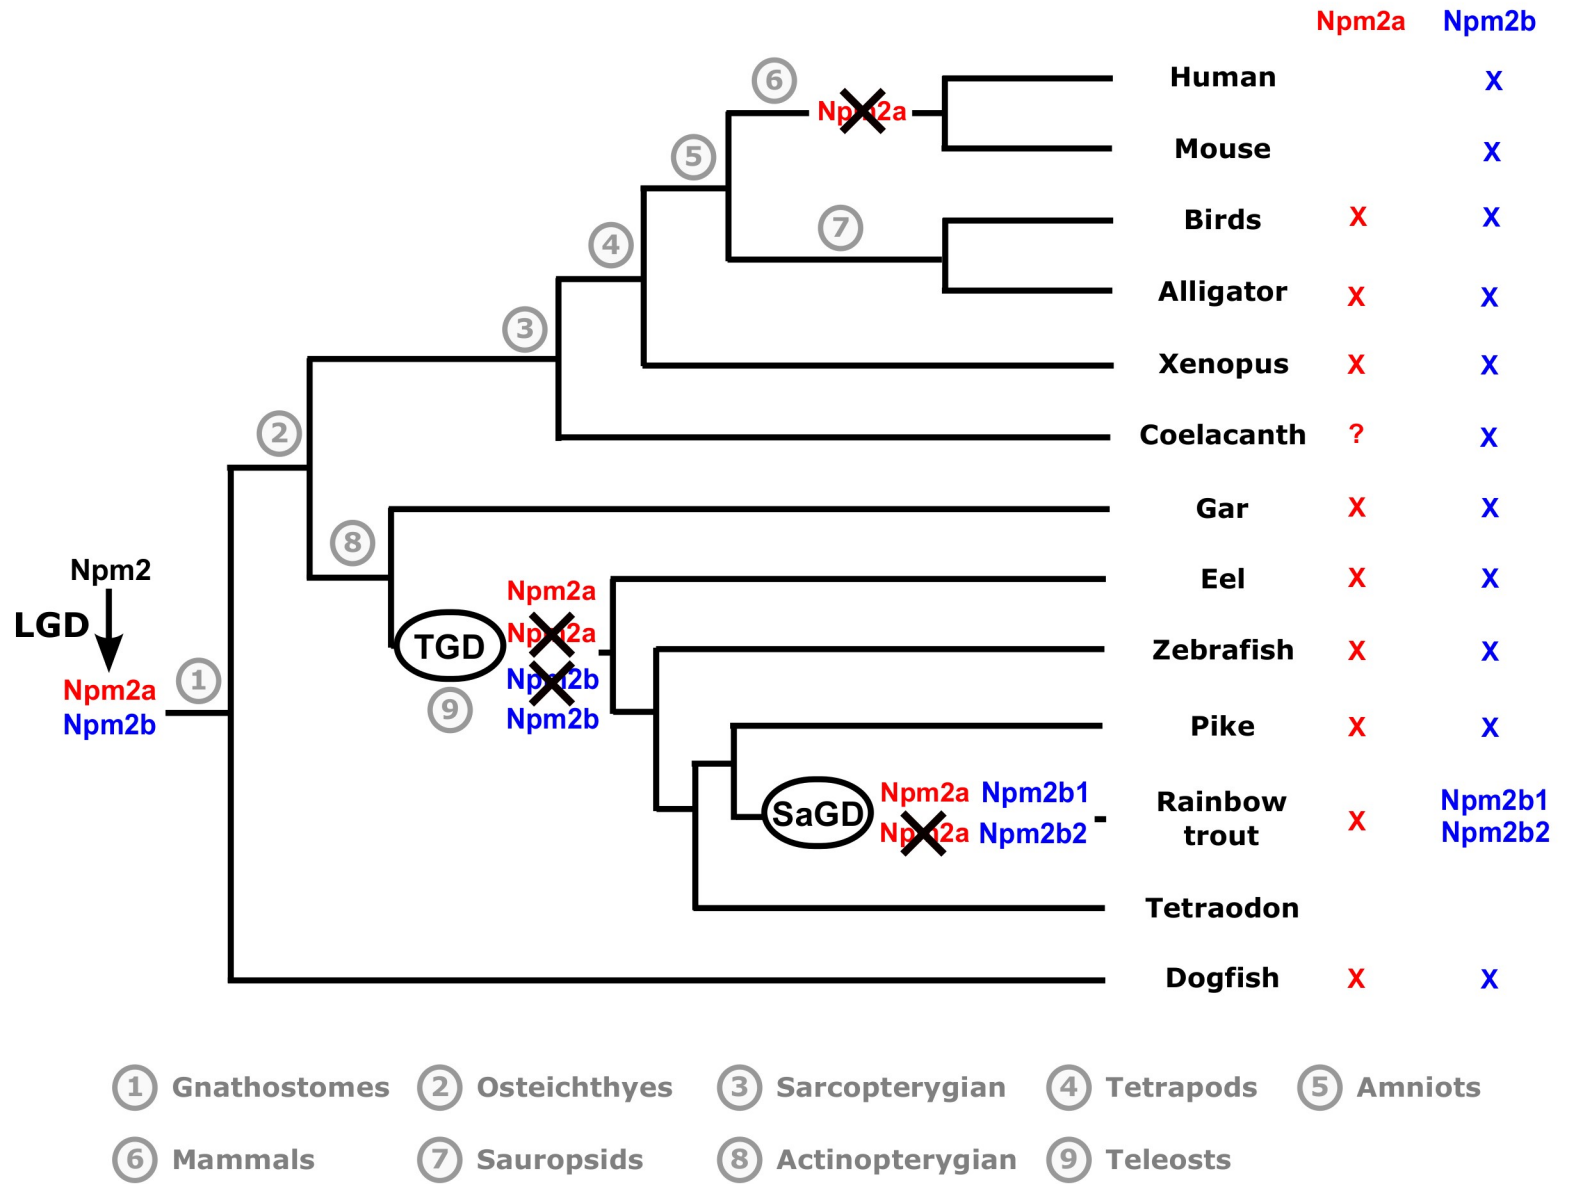

# Figure 4

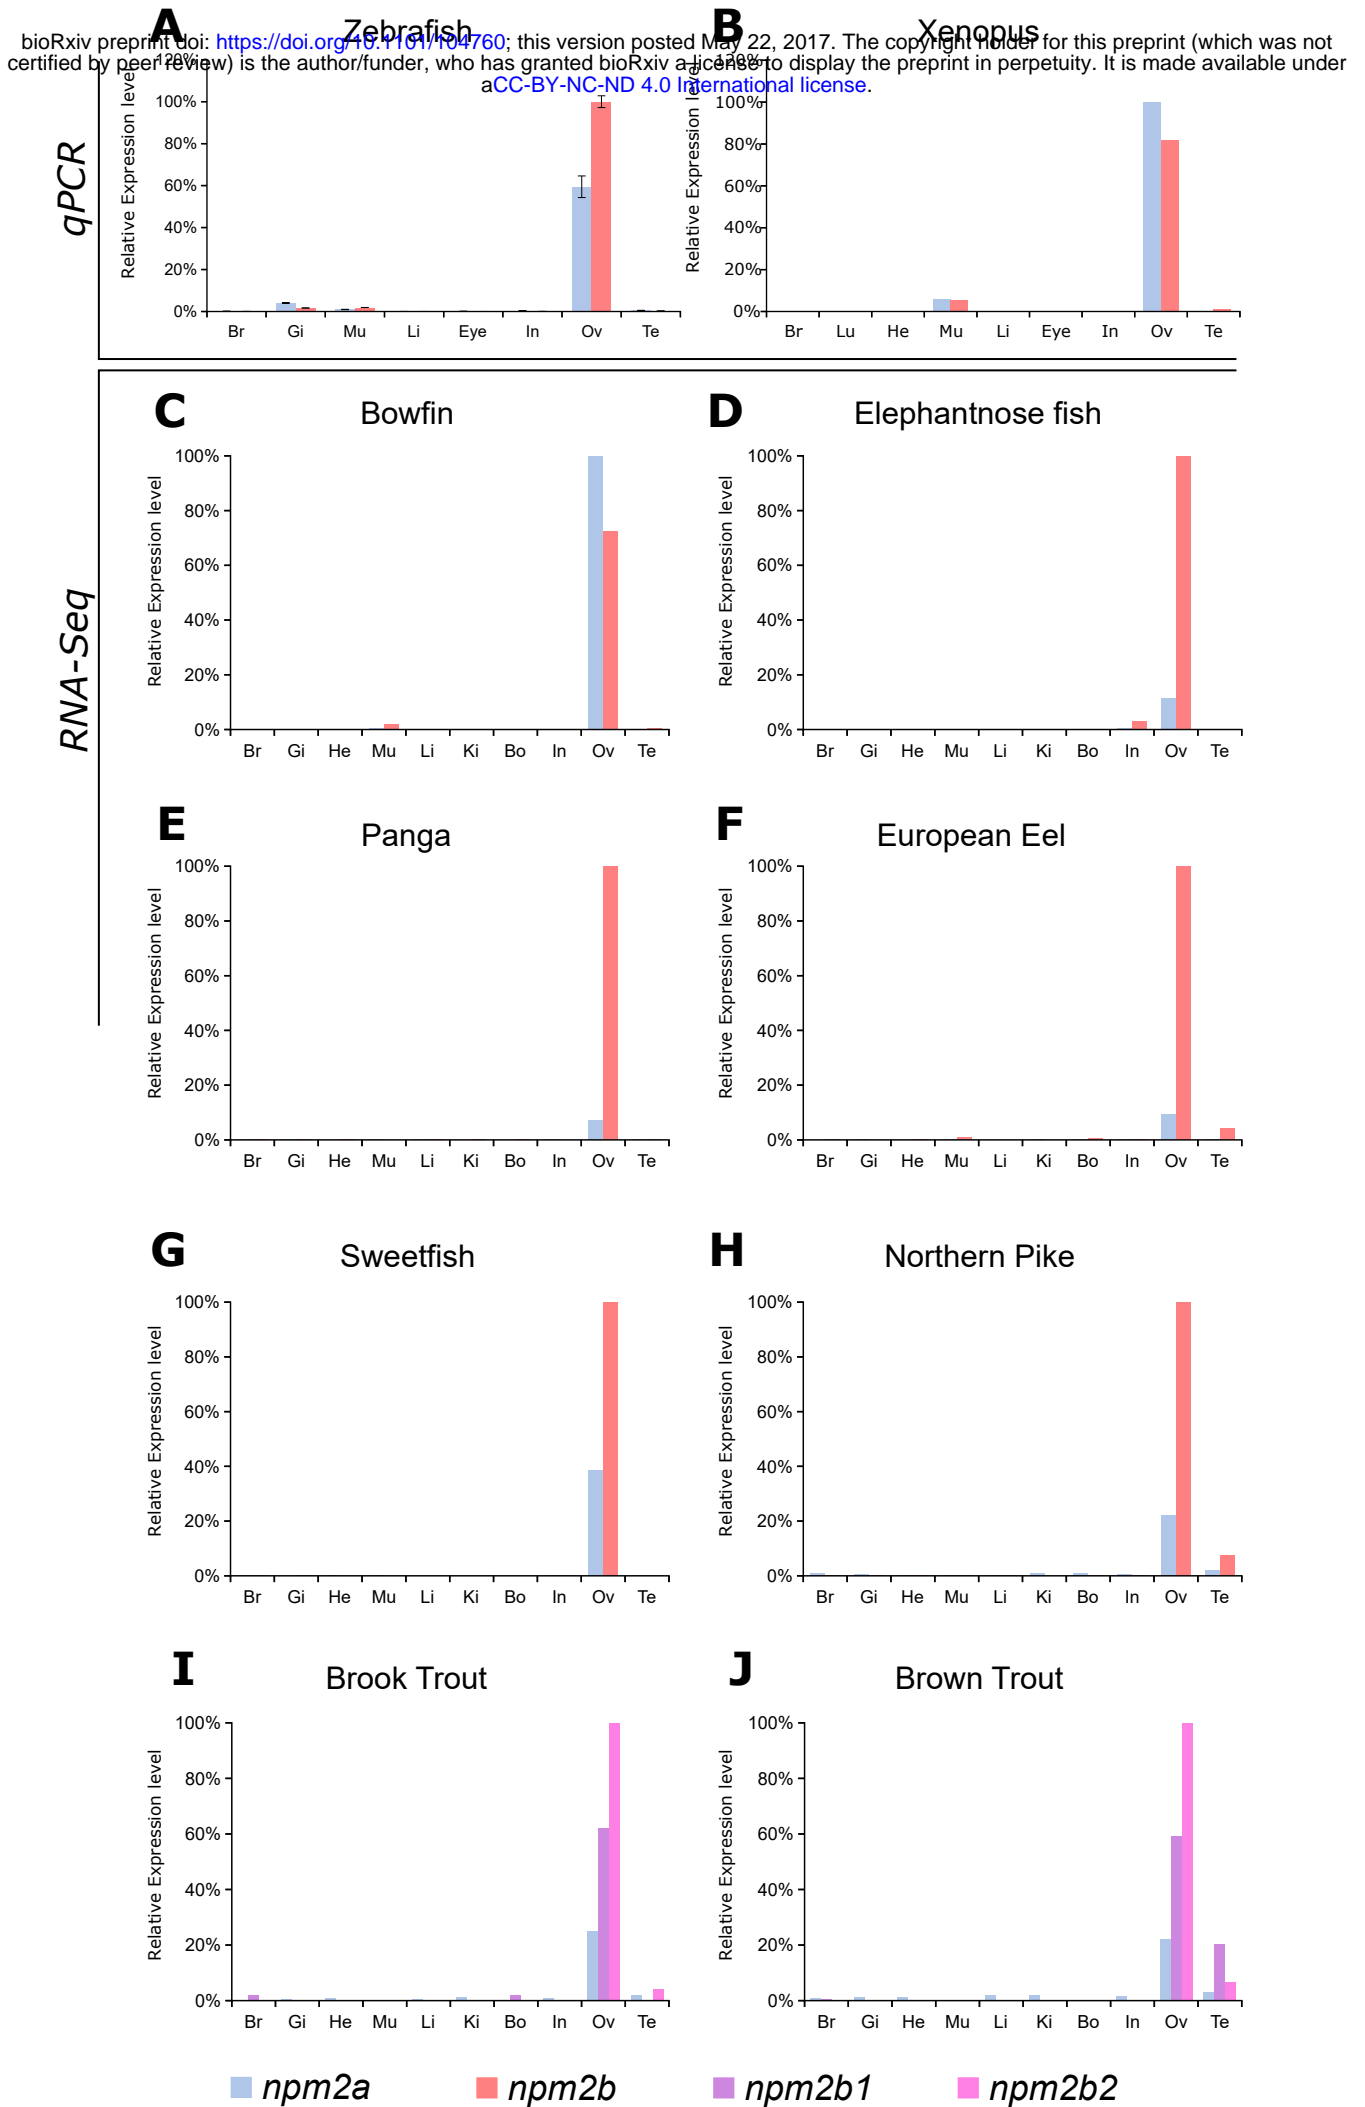

## Figure 5

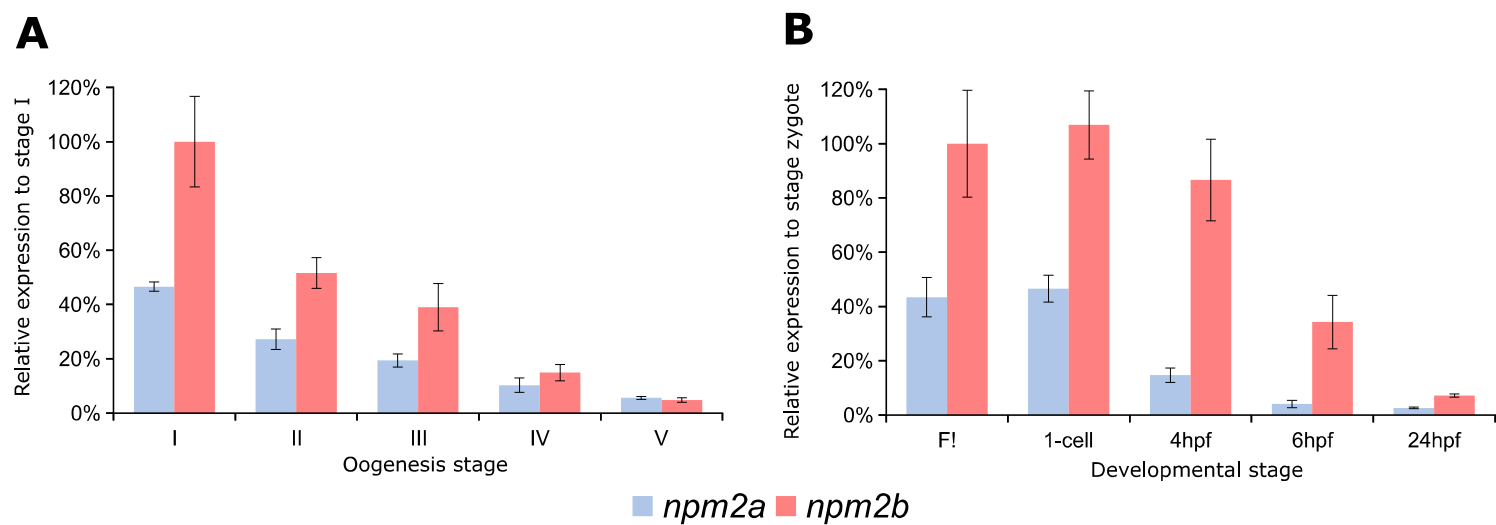

## Figure 6

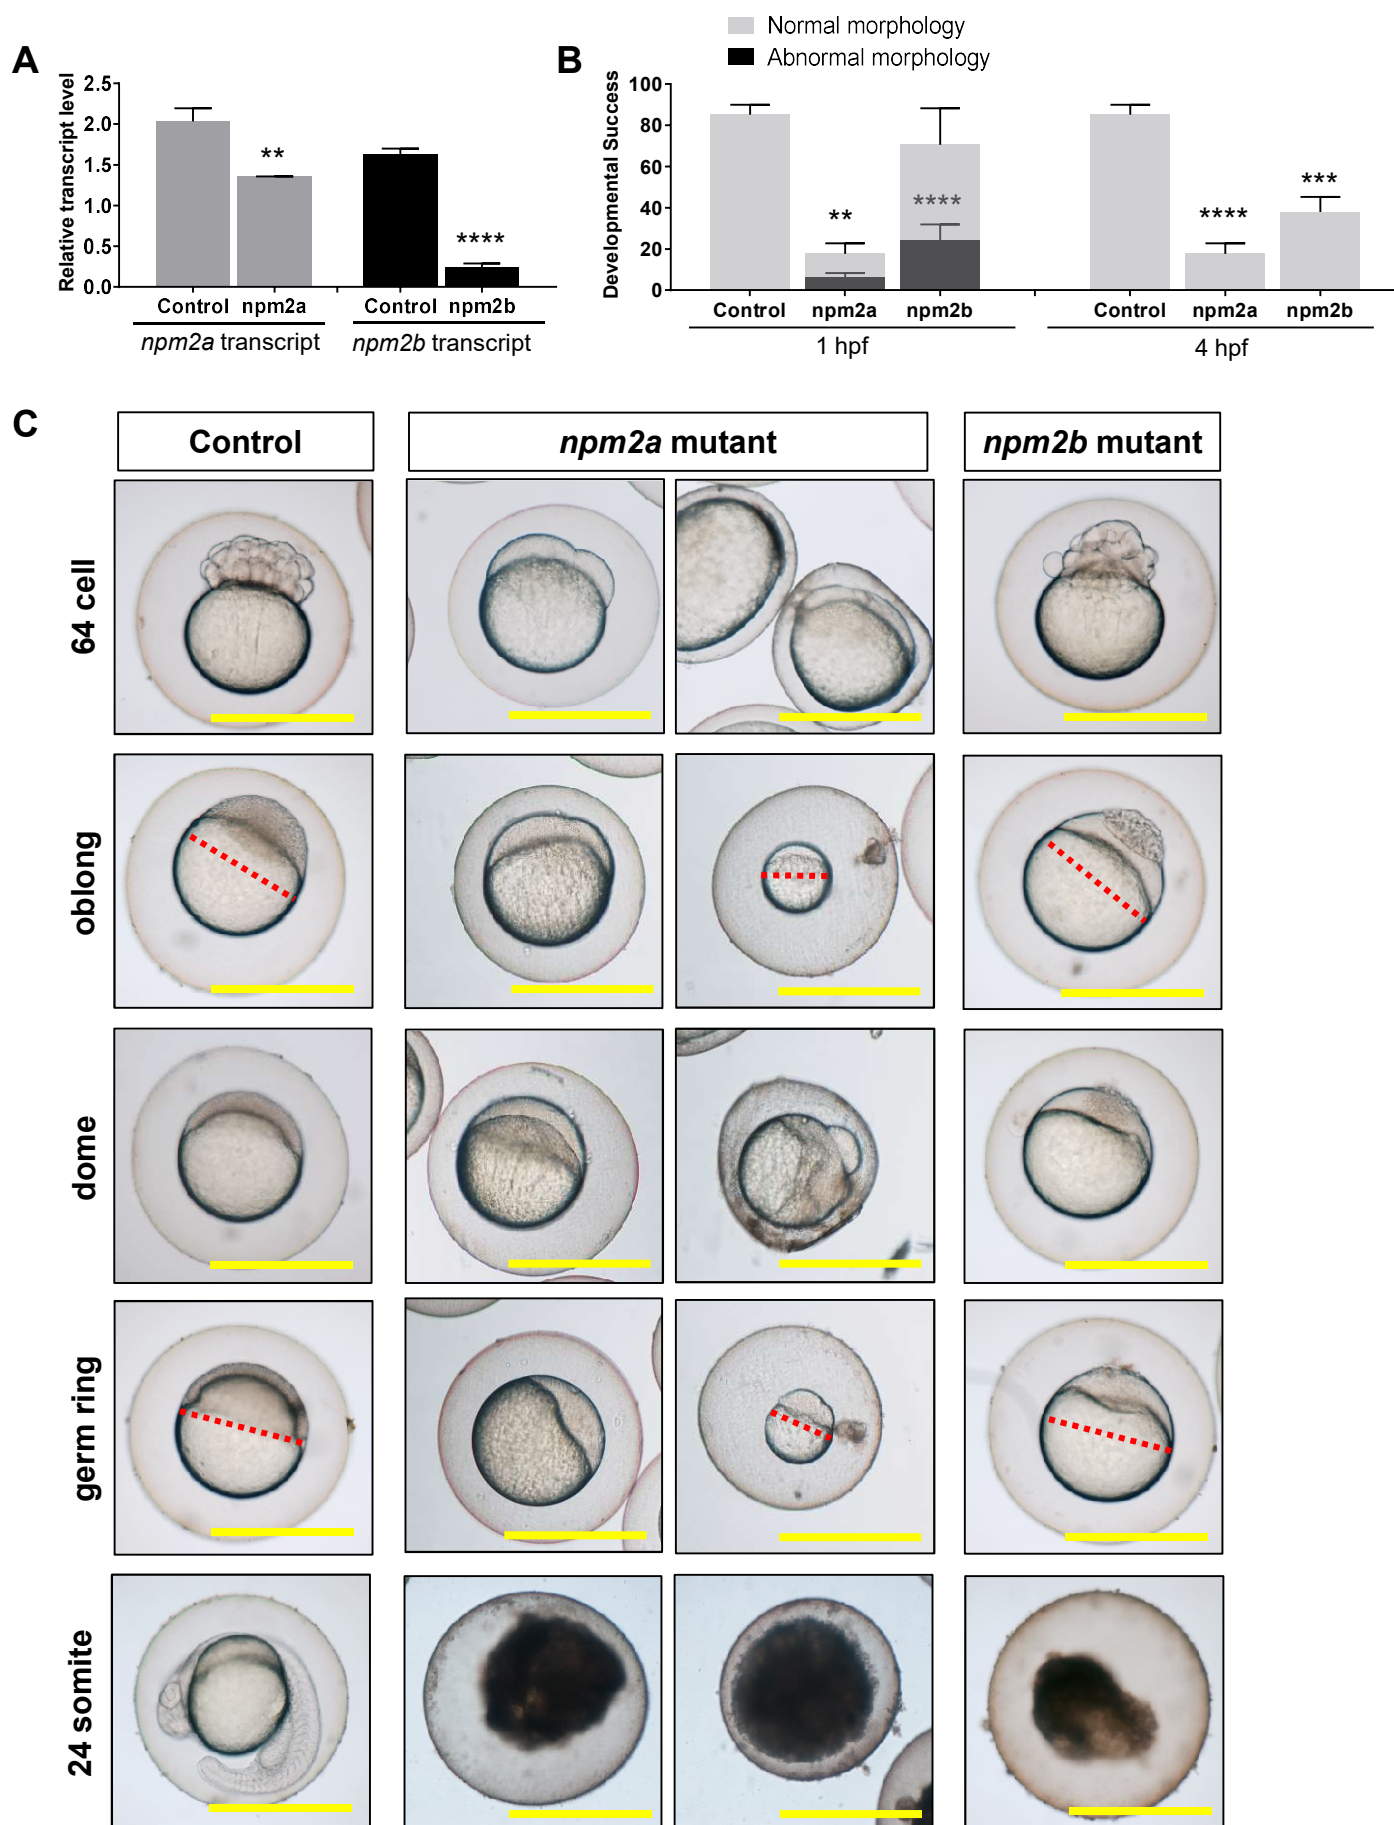

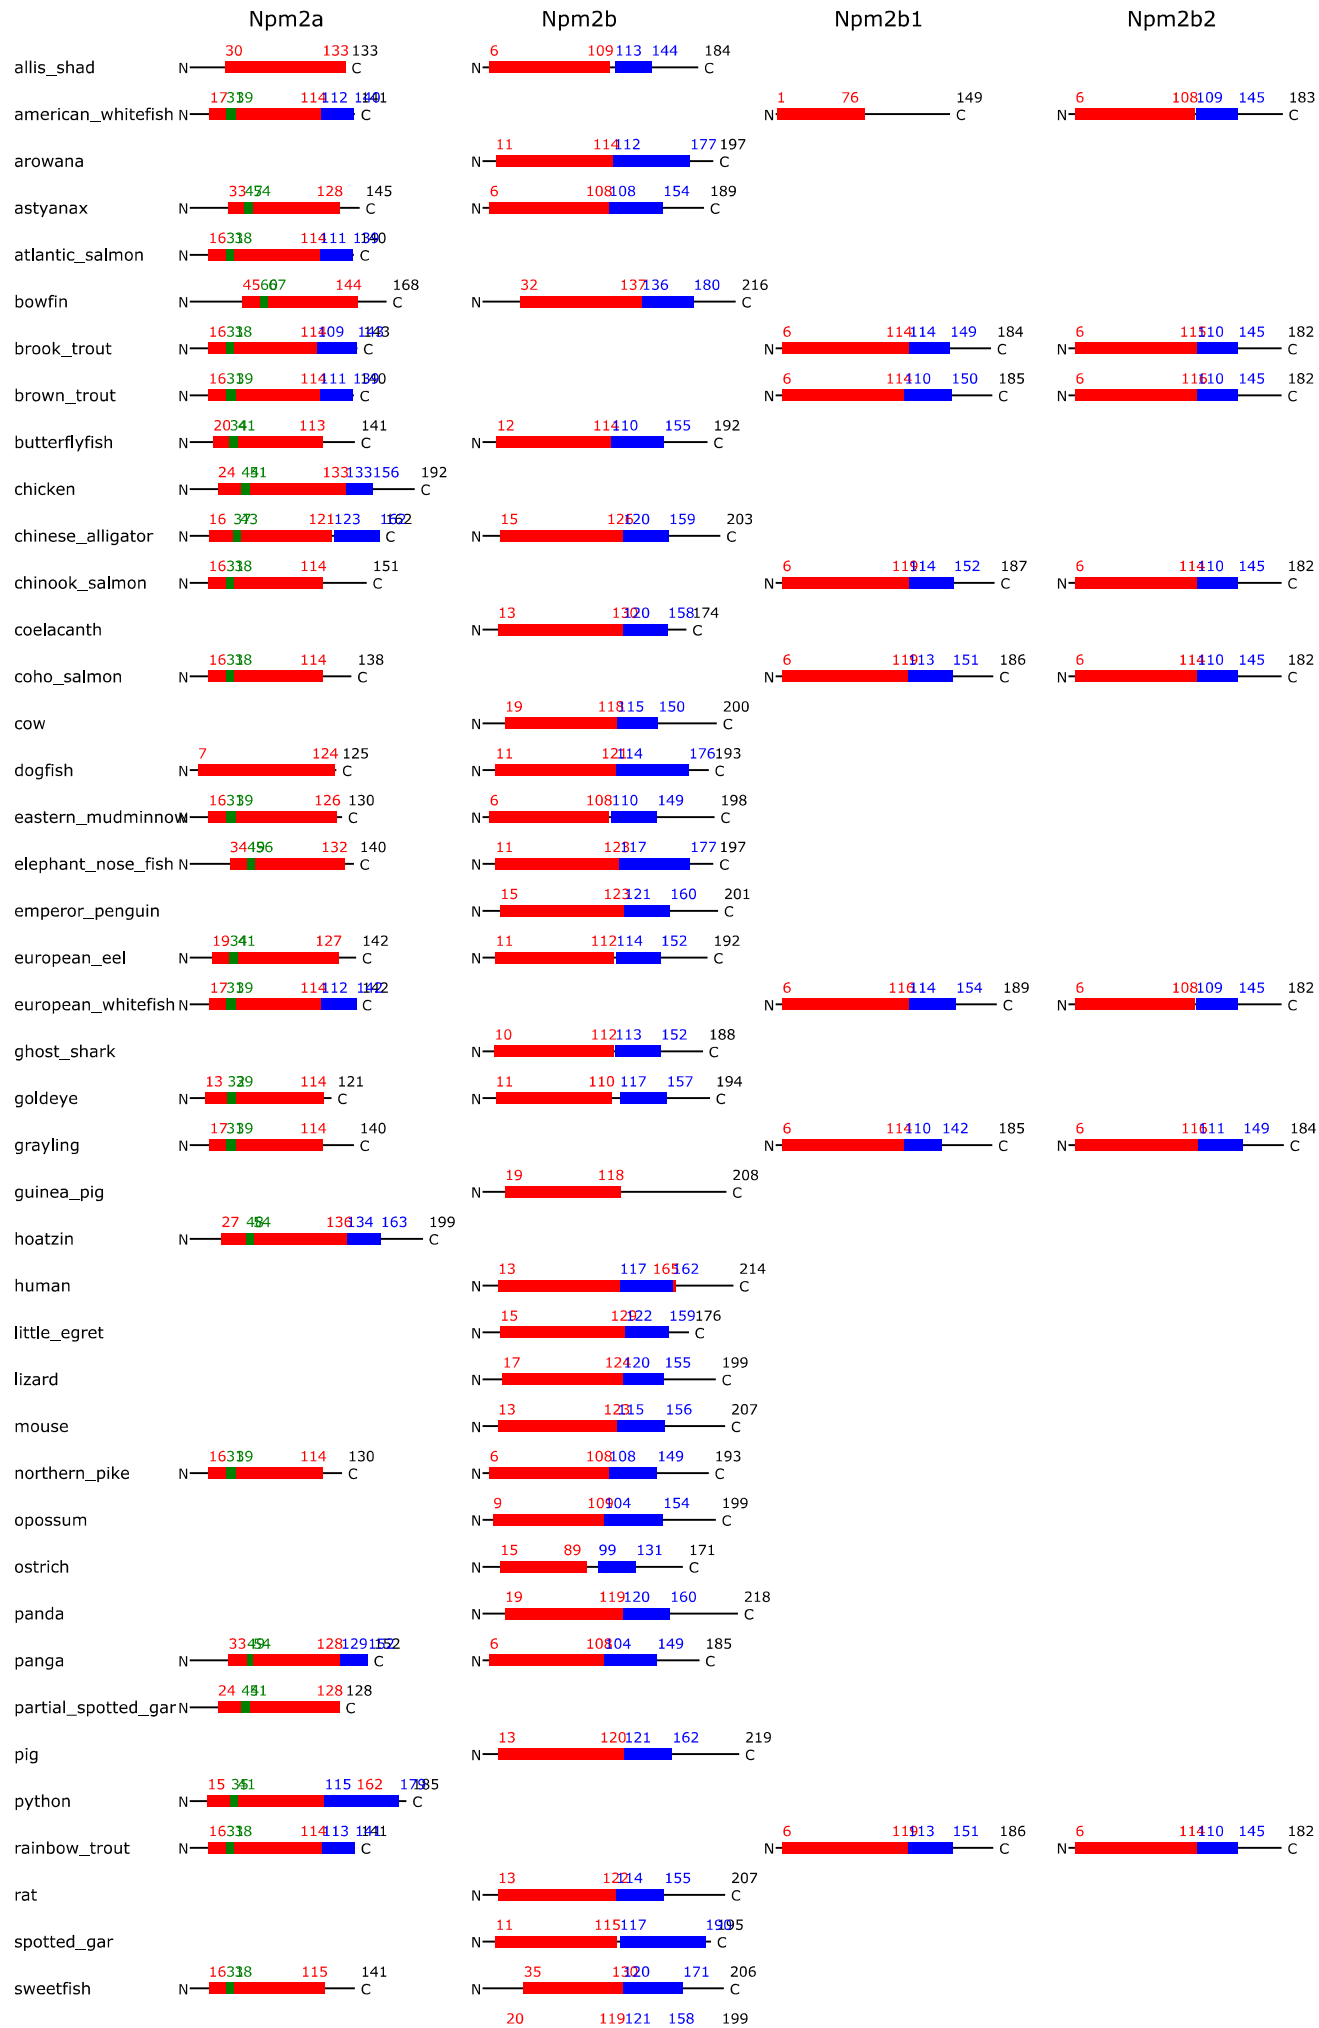

## Supplemental Figures

S2

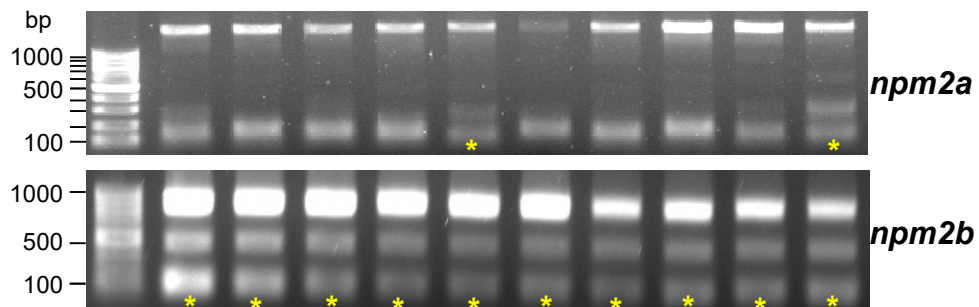

Source: https://www.biorxiv.org/content/biorxiv/early/2017/05/22/104760.full.pdf
